1 A chromosome-level genome assembly of the European Beech (*Fagus*  
2 *sylvatica*) reveals anomalies for organelle DNA integration, repeat  
3 content and distribution of SNPs

4 Bagdevi Mishra<sup>1,2</sup>, Bartosz Ulaszewski<sup>3</sup>, Joanna Meger<sup>3</sup>, Markus Pfenninger<sup>1</sup>, Deepak K Gupta<sup>1,2,4</sup>,  
5 Stefan Wötzel<sup>1,2</sup>, Sebastian Ploch<sup>1</sup>, Jaroslaw Burczyk<sup>3</sup>, Marco Thines<sup>1,2,4\*</sup>

6

7 <sup>1</sup> Senckenberg Biodiversity and Climate Research Centre (BiK-F), Senckenberg Gesellschaft für  
8 Naturforschung, Senckenberganlage 25, D-60325 Frankfurt am Main, Germany

9 <sup>2</sup> Goethe University, Department for Biological Sciences, Institute of Ecology, Evolution and Diversity,  
10 Max-von-Laue-Str. 9, D-60438 Frankfurt am Main, Germany

11 <sup>3</sup> Kazimierz Wielki University, Department of Genetics, ul. Chodkiewicza 30, 85-064 Bydgoszcz, Poland

12 <sup>4</sup>LOEWE Centre for Translational Biodiversity Genomics (TBG), Georg-Voigt-Str. 14-16, D-60325  
13 Frankfurt am Main (Germany)

14

15 \*author for correspondence – [m.thines@thines-lab.eu](mailto:m.thines@thines-lab.eu)

16

17

18

19

20

21 **Abstract**

22 **Background:** The European Beech is the dominant climax tree in most regions of Central Europe and  
23 valued for its ecological versatility and hardwood timber. Even though a draft genome has been  
24 published recently, higher resolution is required for studying aspects of genome architecture and  
25 recombination. **Results:** Here we present a chromosome-level assembly of the more than 300 year-  
26 old reference individual, Bhaga, from the Kellerwald-Edersee National Park (Germany). Its nuclear  
27 genome of 541 Mb was resolved into 12 chromosomes varying in length between 28 Mb and 73 Mb.  
28 Multiple nuclear insertions of parts of the chloroplast genome were observed, with one region on  
29 chromosome 11 spanning more than 2 Mb of the genome in which fragments up to 54,784 bp long  
30 and covering the whole chloroplast genome were inserted randomly. Unlike in *Arabidopsis thaliana*,  
31 ribosomal cistrons are present in *Fagus sylvatica* only in four major regions, in line with FISH studies.  
32 On most assembled chromosomes, telomeric repeats were found at both ends, while centromeric  
33 repeats were found to be scattered throughout the genome apart from their main occurrence per  
34 chromosome. The genome-wide distribution of SNPs was evaluated using a second individual from  
35 Jamy Nature Reserve (Poland). SNPs, repeat elements and duplicated genes were unevenly  
36 distributed in the genomes, with one major anomaly on chromosome 4. **Conclusions:** The genome  
37 presented here adds to the available highly resolved plant genomes and we hope it will serve as a  
38 valuable basis for future research on genome architecture and for understanding the past and future  
39 of European Beech populations in a changing climate.

40

41 **Keywords** – Chromosomes, Fagaceae, genome architecture, genomics, Hi-C, repeat elements, SNPs

42

43

44

## 45 **Data Description**

## 46 **Background**

47 Many lowland and mountainous forests in Central Europe are dominated by the European Beech  
48 (*Fagus sylvatica*) [1]. This tree is a shade-tolerant hardwood tree that can survive as a sapling in the  
49 understory for decades until enough light becomes available for rapid growth and maturation [2, 3].  
50 Beech trees reach ages of 200-300 years, but older individuals are known e.g. from suboptimal  
51 habitats, especially close to the tree line [4]. Under optimal water availability, European Beech is able  
52 to outcompete most other tree species, forming monospecific stands [5], but both stagnant soil  
53 water and drought restrict its presence in natural habitats [6, 7]. Particularly, dry summers, which  
54 have recently been observed in Central Europe and that are predicted to increase as a result of  
55 climate change [8, 9], will intensify climatic stress as already now severe damage has been observed  
56 [7, 10]. In order to cope with this, human intervention in facilitating regeneration of beech forests  
57 with more drought-resistant genotypes might be a useful strategy [11, 12]. However, for the  
58 selection of drought-resistant genotypes, whole genome sequences of trees that thrive in  
59 comparatively dry conditions and the comparison with trees that are declining in drier conditions are  
60 necessary to identify genes associated with tolerating these adverse conditions [13]. Such genome-  
61 wide association studies rely on well-assembled reference genomes onto which genome data from  
62 large-scale resequencing projects can be mapped (e.g. [14]).

63 Due to advances in library construction and sequencing, chromosome-level assemblies have been  
64 achieved for a variety of genomes from various kingdoms of life, including animals [15, 16, 17]. While  
65 the combination of short- and long-read sequencing has brought about a significant improvement in  
66 the assembly of the gene space and regions with moderate repeat-element presence, chromosome  
67 conformation information libraries, such as Hi-C [18], have enabled associating scaffolds across highly  
68 repetitive regions, enabling the construction of super-scaffolds of chromosomal scale (e.g. [19]).  
69 Recently, the first chromosome-level assemblies have been published for tree and shrub species, e.g.

70 the tea tree (*Camellia sinensis* [20]), loquat (*Eriobotrya japonica* [21]), walnut (*Juglans regia* [22]),  
71 Chinese tupelo (*Nyssa sinensis* [23]), fragrant rosewood (*Dalbergia odorifera* [24]), wheel tree  
72 (*Trochodendron aralioides* [25]), azalea (*Rhododendron simsii* [26]), agrarwood tree (*Aquilaria*  
73 *sinensis* [27]), and tea olive (*Osmanthus fragrans* [28]). However, such resources are currently lacking  
74 for species of the *Fagaceae*, which includes the economically and ecologically important genera  
75 *Castanea*, *Fagus*, and *Quercus* [29]. For this family, various draft assemblies have been published [30,  
76 31, 32], including European Beech [33], but none is so far resolved on a chromosome scale. To  
77 achieve this, we have sequenced the genome of the more than 300 year-old beech individual, Bhaga,  
78 from the Kellerwald-Edersee National Park (Germany), and compared it to an individual from the  
79 Jamy Nature Reserve (Poland), to get first insights into the genome architecture and variability of  
80 *Fagus sylvatica*.

81

## 82 **Materials and Methods**

### 83 *Sampling and processing*

84 The more than 300 year-old beech individual Bhaga (Fig. 1) lives on a rocky outcrop on the edge of a  
85 cliff in the Kellerwald-Edersee National Park in Hesse, Germany (51°10'09"N 8°57'47"E). Dormant  
86 buds were collected for the extraction of high molecular weight DNA as described previously [33] and  
87 for constructing Hi-C libraries in February 2018. Hi-C libraries construction and sequencing was done  
88 by a commercial sequencing provider (BGI, Hong Kong, China). For an initial assessment of genome  
89 variability, Illumina reads derived from the Polish individual, Jamy, reported in Mishra et al. [34],  
90 were used (see below).

91

### 92 *Chromosomal pseudo molecule building using Hi-C reads*

93 The previous scaffold-level assembly was constructed with Illumina shotgun short reads and PacBio  
94 long reads [33]. For a chromosome-level assembly, intermediate results from the previous assembly  
95 were used as the starting material. Sequence homology of the 6699 scaffolds generated from the  
96 DBG2OLC hybrid assembler [35] to the separately assembled chloroplast and mitochondria of Beech  
97 were inferred using blast v2.10.1 [36]. All scaffolds that match in full length to any of the Organelle  
98 with identity > 99 % and gaps and/or mismatches  $\leq 3$  were discarded. The remaining 6657 scaffolds  
99 along with Hi-C data (116 Mb) were used in allhic [37] for building the initial Chromosome level  
100 assembly. The cleaned Illumina reads were aligned to the initial assembly using Bowtie2 software  
101 [38] and then, sorted and indexed bam files of the concordantly aligned read pairs for all the  
102 sequences were used in Pilon [39] to improve the correctness of the assembly. The final assemblies  
103 for Bhaga and Jamy were deposited under the accession numbers PRJEB24056 and PRJNA450822,  
104 respectively.

105 The completeness of the assembly was evaluated with plant-specific (viridiplantae\_odb10.2019-11-  
106 20) and eudicot-specific (eudicots\_odb10.2019-11-20) Benchmarking Universal Single-Copy  
107 Orthologs (BUSCO v4.1.4) [40].

108

### 109 *Gene prediction*

110 Cleaned transcriptomic Illumina reads (minimum read length: 70; average read quality: 25 and read  
111 pairs containing no N) were aligned to the assembly using Hisat [41] in order to generate splice-  
112 aware alignments. The sorted and indexed bam file (samtools, v1.9 [42]) of the splice alignments was  
113 used in “Eukaryotic gene finding” pipeline of OmicsBox [43] which uses Augustus [44] for gene  
114 prediction. For prediction, few parameters were changed from the default values. Minimum intron  
115 length was set to 20 and minimum exon length was set to 200 and complete genes (with start and  
116 stop codon) of a minimum of 180 bp length were predicted, by choosing *Arabidopsis thaliana* as the  
117 closest organism.

118

119 *Assessment of the gene space*

120 The protein sequences of the PLAZA genes for *A. thaliana*, *Vitis vinifera*, and *Eucalyptus grandis* were  
121 downloaded from plaza v4.5 dicots [45] dataset and were used along with the predicted proteins  
122 from our assembly to make protein clusters using cd-hit v.4.8.1 [46, 47]. The number of exons per  
123 genes was assessed and compared to the complete coding genes from *A. thaliana*, *Populus*  
124 *trichocarpa*, and *Castanea mollissima*, in line with the comparison made in the scaffold level  
125 assembly [33].

126

127 *Functional annotation of the genes*

128 The predicted genes were translated into proteins using transeq (EMBOSS:6.6.0.0 [48]) and were  
129 queried against the non-redundant database from NCBI (downloaded on 2020-06-24) [49] using  
130 diamond (v0.9.30) software [50] to find homology of the predicted proteins to sequences of known  
131 functions. For prediction of protein family membership and the presence of functional domains and  
132 sites in the predicted proteins, Interproscan (v5.39.77) software [51] was used. Result files from both  
133 diamond and Interproscan (in Xml format) were used in the blast2go [52] module of OmicsBox and  
134 taking both homology and functional domains into consideration, the final functional annotations  
135 were assigned to the genes. The density of coding space for each 100 kb region stretch was  
136 calculated for all the Chromosomes.

137

138 *Repeat prediction and analysis*

139 A repeat element database was generated using RepeatScout (v1.0.5) [53], which was used in  
140 RepeatMasker (v4.0.5) [54] to predict repeat elements. The predicted repeat elements were further  
141 filtered on the basis of their copy numbers. Those repeats represented with at least 10 copies in the

142 genome were retained as the final set of repeat elements of the genome. Repeat fractions per 100  
143 kb region for each of the Chromosomes were calculated for accessing patterns of repeat distribution  
144 over the genome.

145 In a separate analysis, repeat elements present in *Fagus sylvatica* were identified by a combination  
146 of homology-based and de novo approaches using RepeatModeler 2.0 [55] and RepeatMasker v.  
147 4.1.1 [56]. First, we identified and classified repetitive elements de novo and generated a library of  
148 consensus sequences using RepeatModeler 2.0 [55]. We then annotated repeats in the assembly  
149 with RepeatMasker 4.1.1 [56] using the custom repeat library generated in the previous step.

150

#### 151 *Telomeric and Centromeric repeat identification*

152 Tandem repeat finder (TRF version 4.0.9) [57] was used with parameters 2, 7, 7, 80, 10, 50 and 500  
153 for Match, Mismatch, Delta, PM, PI, Minscore and MaxPeriod respectively [22] and all tandem  
154 repeats with monomer length up to 500 bp were predicted. Repeat frequencies of all the monomers  
155 were plotted against the length of the monomers to identify all high-frequency repeats. As the  
156 repeats were fetched by TRF program with different start and end positions and the identical repeats  
157 were falsely identified as different ones, the program MARS [58] was used to align the monomers of  
158 the different predicted repeats, and the repeat frequencies were adjusted accordingly. The  
159 chromosomal locations of telomeric and centromeric repeats were identified by blasting the repeats  
160 to the chromosomes. For confirmation of centromeric locations, pericentromeres of *A. thaliana* were  
161 blasted against the chromosomes of Bhaga.

162

#### 163 *Organelle integration*

164 Separately assembled chloroplast and mitochondrial genomes were aligned to the genomic assembly  
165 using blastn with an e-value cut-off of 10e-10. Information for different match lengths and different

166 identity cut-offs were tabulated and analysed. Locations of integration into the nuclear genome were  
167 inferred at different length cut-offs for sequence homology (identity) equal to or more than 95%. The  
168 number of insertions per non-overlapping window of 100 kb was calculated separately for both  
169 organelles.

170

#### 171 *SNP identification and assessment*

172 The DNA isolated from the Polish individual Jamy individual was shipped to Macrogen Inc. (Seoul,  
173 Rep. of Korea) for library preparation with 350 bp targeted insert size using TruSeq DNA PCR Free  
174 preparation kit (Illumina, USA) and sequencing on HiSeq X device (Illumina, USA) using PE-150 mode.  
175 The generated 366,127,860 raw read pairs (55.3 Gb) were processed with AfterQC v 0.9.1 [59] for  
176 quality control, filtering, trimming and error removal with default parameters resulting in 54.12 Gbp  
177 of high quality data. Illumina shotgun genomic data from Jamy was mapped to the Chromosomes  
178 level assembly using stringent parameters (--very-sensitive mode of mapping) in bowtie2 [38]. The  
179 sam formatted output of Bowtie2 was converted to binary format and sorted according to the  
180 coordinates using samtools version 1.9 [42]. SNPs were called from the sorted mapped data using  
181 bcftools (version: 1.10.2) [60] call function. SNPs were called for only those genomic locations with  
182 sequencing depth  $\geq 10$  bases. All locations 3 bp upstream and downstream of gaps were excluded.  
183 For determining heterozygous and homozygous states in Bhaga, sites with more than one base called  
184 and a ratio between the alternate and the reference allele of  $\geq 0.25$  and  $< 0.75$  in were considered as  
185 heterozygous SNP. Where the ratio was  $\geq 0.75$ , the position was considered homozygous. In addition,  
186 homozygous SNPs were called by comparison to Jamy, where the consensus base in Jamy has  
187 different than in Bhaga and Bhaga was homozygous at that position. SNP density was calculated for  
188 each chromosome in 100 kb intervals.

189

#### 190 *Genome browser*



191 A genome browser was set up using JBrowse v.1.16.10 [61]. Tracks for the predicted gene model,  
192 annotated repeat elements were added using the gff files. Separate tracks for the SNP locations and  
193 the locations of telomere and centromere were added as bed files. A track depicting the GC content  
194 was also added. The genome browser can be accessed from <http://beechgenome.net>.

195

## 196 **Results**

### 197 *General genome features*

198 The final assembly of the Bhaga genome was based on hybrid assembly of PacBio and Illumina reads  
199 as well as scaffolding using a Hi-C library. It was resolved into 12 chromosomes, spanning 535.4 Mb  
200 of the genome and 155 unassigned contigs of 4.9 Mb, which to 79% consisted of unplaced repeat  
201 regions that precluded their unequivocal placement. It revealed a high level of BUSCO gene detection  
202 (97.4%), surpassing that of the previous assembly and other genome assemblies available for  
203 members of the *Fagaceae* (Table 1). Of the complete assembly, 57.12% were annotated as  
204 interspersed repeat regions and 1.97% consisted of simple sequence repeats (see Supplementary File  
205 1 for details regarding the repeat types and abundances).

206 The gene prediction pipeline yielded 63,736 complete genes with start and stop codon and a  
207 minimum length of 180 bp. Out of these, 2,472 genes had alternate splice variants. For 86.8% of all  
208 genes, a functional annotation could be assigned. Gene density varied widely in the genome, ranging  
209 from zero per 100 kb window to 49.7%, with an average and median of 18.2% and 17.6%,  
210 respectively. Gene lengths ranged from 180 to 54,183 bp, with an average and median gene length of  
211 3,919 and 3,082 bp, respectively. In *Fagus sylvatica* 4.9 exons per gene were found on average,  
212 corresponding well to other high-quality plant genome drafts. The distribution of exons and introns  
213 in comparison to *J. regia* and *A. thaliana* are presented in Table 2. An analysis of PLAZA genes  
214 identified 28,326 such genes in *F. sylvatica*, out of which 1,776 genes were present in three other  
215 species used for comparison (Supplementary File 2).

216

217 *Telomere and centromere predictions*

218 The tandem repeat element TTTAGGG was the most abundant repeat in the genome and was the  
219 building block of the telomeric repeats. Out of 12 chromosomes, 8 have stretches of telomeric  
220 repeats towards both ends of the chromosomes and the other 4 chromosomes have telomeric  
221 repeats towards only one end of chromosomes (Fig. 2). One unplaced scaffold of 110,653 bp which is  
222 composed of 12,051 bp of telomeric repeats at one end, probably represents one of the missing  
223 chromosome ends.

224 Two different types of potential centromeric repeats were observed, consisting of 79 bp and 80 bp  
225 monomer units (Supplementary File 3). Centromeric repeats were also observed in higher numbers  
226 outside the main centromeric region on several chromosomes (Supplementary File 3). However,  
227 except for chromosome 10, there was a clear clustering of centromeric repeats within each of the  
228 chromosomes, likely corresponding to the actual centromere of the respective chromosomes, and  
229 supported also by complementary evidence, such as similarities to centromeric regions of *A.*  
230 *thaliana*, high gypsy element content and low GC content (Supplementary File 3).

231

232 *Integration of organelle DNA in the nuclear genome*

233 For both chloroplast and mitochondria, multiple integrations of fragments of variable length of their  
234 genomic DNA were observed in all chromosomes (Figs. 3, 4). These fragments varied in length from  
235 the minimum size threshold (100 bp) to 54,784 bp for the chloroplast and 26,510 bp for the  
236 mitochondrial DNA. The identity of the integrated organelle DNA with the corresponding stretches in  
237 the organelle genome ranged from the minimum threshold tested of 95% to 100%. Nuclear-  
238 integrated fragments of organelle DNA exceeding 10 kbp were found on six chromosomes for the  
239 chloroplast, but only on one chromosome for the mitochondrial genome (Figs. 3, 4).

240 The integration of organelle DNA into the nuclear genome was mostly even, but tandem-like  
241 integrations of chloroplast DNA on chromosome 2 were observed (Fig. 3). In addition, insertions of  
242 both organelles were found close to the ends in 4 of the 24 chromosome ends (4, 6, 7, and 8). For the  
243 insertions further than 500 kb away from the chromosome ends the integration sites of  
244 mitochondrion DNA were sometimes found within the same 100 kb windows where the chloroplast  
245 DNA insertion was found. If some regions of the genome are more amenable for the integration of  
246 organelle DNA than others needs to be clarified in future studies. A major anomaly was found on  
247 Chromosome 11, where in a stretch of about 2 Mb consisting mainly of multiple insertions of both  
248 chloroplast and mitochondrial DNA was observed. In this region, an insertion of more than 20 kb of  
249 mitochondrial DNA was flanked by multiple very long integrations of parts of the chloroplast genome  
250 on both sides (Figs. 3, 4).

251 Nuclear insertions with sequence identity > 99% were about ten times more frequent for chloroplast  
252 than for mitochondrial DNA with 173 vs. 16 for fragments > 1 kb and 115 vs. 11 for fragments > 5 kb,  
253 respectively. Eight of these matches of mitochondria were located on unplaced contigs. Overall,  
254 mitochondrial insertions tended to be smaller and show a slightly higher sequence similarity  
255 (Supplementary File 4), suggesting that they might be purged from the nuclear genome quicker than  
256 the chloroplast genome insertions.

257

### 258 *Repeat elements and gene space*

259 The most abundant repeat elements were LTR elements and LINEs, covering 11.49% and 3.66% of  
260 the genome, respectively. A detailed list of the element types found, their abundance and  
261 proportional coverage of the genome is given in Supplementary File 1. Repeat elements presence  
262 was variable across the chromosomes (Fig. 5). While the repeat content per 100 kb window  
263 exceeded 50 % over more than 88% of chromosome 1, this was the case for only 37.5% of  
264 chromosome 9. Chromosomes showed an accumulation of repeat elements towards their ends,

265 except for chromosome 10, where only a moderate increase was observed on one of the ends, and  
266 chromosome 1, where repeat elements were more evenly distributed. Repeat content was unevenly  
267 distributed, with a patchy distribution of repeat-rich and repeat-poor regions of variable length.

268 A conspicuous anomaly was noticed in chromosome 4, where at one end a large region of about 10  
269 Mb was found in which 97% of the 100 kb windows had a repeat content greater than 70%. This  
270 region also contained a high proportion of duplicated or multiplied genes (Fig. 5). Additional  
271 regions containing more than 20% of duplicated genes within a window of at least 1 Mb were  
272 identified on chromosomes 4, 10, and 11. On chromosome 11, two clusters were detected, one of  
273 which corresponded to the site of organelle DNA insertions described above.

274 The ribosomal cistrons were reported to be located at the telomeres of four different chromosomes  
275 in *F. sylvatica* [58]. Due to the highly repetitive nature of the ribosomal repeats and their placement  
276 near the telomeres, they could not be assigned with certainty to specific chromosomes and thus  
277 remained in four unplaced contigs. However, the 5S unit, which is separate from the other ribosomal  
278 units in *F. sylvatica*, could be placed near the centromeric locations of chromosomes 1 and 2, in line  
279 with the locations inferred by fluorescence microscopy [62].

280 Coding space was more evenly distributed over the chromosomes, with the exception of the regions  
281 with high levels of duplicated or multiplied genes. Apart from this, a randomly fluctuating proportion  
282 of coding space was observed, with only few regions that seemed to be slightly enriched or depleted  
283 in terms of coding space, e.g. in the central part of chromosome 8.

284

#### 285 *Distribution of single nucleotide polymorphisms*

286 A total of 2,787,807 SNPs were identified out of which 1,271,410 SNPs were homozygous (i.e. an  
287 alternating base on both chromosomes between Bhaga and Jamy) and 1,582,804 were heterozygous

288 (representing two alleles within Bhaga). A total of 269,756 SNPs fell inside coding regions out of  
289 which 119,946 were homozygous.

290 Heterozygous SNPs were very unequally distributed over the chromosomes (Fig. 6). Several regions,  
291 the longest of which comprised more than 30 Mb on chromosome 6, contained only very low  
292 amounts of heterozygous SNPs. Apart from the chromosome ends, where generally few  
293 heterozygous positions were observed, all chromosomes contained at least one window of 1 Mb  
294 where only very few heterozygous SNPs were present. On chromosomes 2, 3, 4, 6, and 9 such areas  
295 extended beyond 5 Mb. On chromosome 4 this region corresponded to the repeat region anomaly  
296 reported in the previous paragraph, but for the region poor in heterozygous SNPs on chromosome 9,  
297 no association with a repeat-rich region could be observed.

298 Homozygous SNPs differentiating Bhaga and Jamy, often followed a different pattern. All regions  
299 with low heterozygous SNP frequency longer than 5 Mb had an above-average homozygous SNP  
300 frequency, with the exception of the anomalous repeat-rich region on Chromosome 4, which had  
301 very low frequencies for both homozygous and heterozygous SNPs. However, there were also two  
302 regions of more than 1 Mb length on Chromosome 11 that also showed low frequencies of both SNP  
303 categories (Fig. 6).

304 Generally, the frequency of overall and intergenic SNPs per 100 kb window corresponded well for  
305 both heterozygous and homozygous SNPs, suggesting neutral evolution. However, there were some  
306 regions in which genic and intergenic SNP frequencies were uncoupled. For example, on  
307 chromosome 1 a high overall heterozygous SNP frequency was observed at 37.7, 48.2 and 56 Mb, but  
308 genic heterozygous SNP frequency was low despite normal gene density, suggesting the presence of  
309 highly conserved genes. In line with this, also the frequency of homozygous genic SNPs was equally  
310 low in the corresponding areas. Similarly, homozygous SNP frequencies were also decoupled on  
311 chromosome 1, where a low frequency was observed at 4.2, 7.1, 38.2, 62.1, and 64.8 Mb, but a high

312 genic SNP frequency was observed. This suggests the presence of diversifying genes in the  
313 corresponding 100 kb windows, such as genes involved in coping with biotic or abiotic stress.

314 In line with the different distribution over the chromosomes, with large areas poor in heterozygous  
315 SNPs, there were much more windows with low numbers of heterozygous SNPs than windows with  
316 homozygous SNPs (Fig. 7). Notably, at intermediate SNP frequencies, homozygous SNPs were found  
317 in more 100 kb windows, while at very high SNP frequencies, heterozygous SNPs were more  
318 commonly found. This pattern is consistent with predominant local pollination, but occasional  
319 introgression of highly distinct genotypes.

320 The genome browser is available at [beechgenome.net](http://beechgenome.net). Predicted genes, annotated repeat elements  
321 and homozygous and heterozygous SNPs are available in “B. Annotations”. The telomeric and  
322 centromeric locations and the GC content details are available in “C. Other Details”.

323

## 324 **Discussion**

### 325 *General genome features*

326 The genome assembled and analysed in this study compares well with previously published *Fagaceae*  
327 genomes, both in terms of size and gene space. We here confirm the base chromosome number of  
328 12, as was previously reported based on chromosome counts [62]. The number of exons per gene is  
329 moderately higher than in the previously published genome of the same individual [33], reflecting  
330 the higher contiguity of the presented chromosome-level assembly. Despite the lower chromosome  
331 number of the Beech genome, it is structurally similar to the available genomes of genus *Juglans*,  
332 which is the most closely related genus for which chromosome-level assemblies are available (*J. regia*  
333 [22]; *J. sigillata* [63]; *J. regia* × *J. microcarpa* [64]).

334

### 335 *Telomere and centromere predictions*

336 Telomeres are inherently difficult to resolve because of long stretches of GC-rich repeats that can  
337 cause artefacts during library preparation [65] and can lead to biased mapping [66]. However, using  
338 long-read sequencing and Hi-C scaffolding, we could identify telomeric repeats on all chromosomes.  
339 It seems likely that several of the unplaced contigs of 4.9 Mb, which included telomeric sequences,  
340 were not correctly anchored in the assembly due to ambiguous Hi-C association data resulting from  
341 the high sequence similarity of telomeric repeats, because of which for four chromosomes we could  
342 identify telomeric repeats only on one of the ends. This might also be due to the presence of  
343 ribosomal cistrons on four chromosome ends, which might have interfered with the Hi-C linkage due  
344 to their length and very high sequence similarity. On the outermost regions of the chromosomes, no  
345 longer telomeric repeat stretches were present most likely due to their ambiguous placement in the  
346 assembly, because of very high sequence similarity.

347 Centromere repeats were identified by screening the genome for repeats of intermediate sizes, and  
348 were found to be present predominantly within a single location per chromosome. However, lower  
349 amounts of centromeric repeat units were also observed to be scattered throughout the genome.  
350 The function of the centromeric repeats outside of the centromere remains largely enigmatic but  
351 could be associated with chromosome structuring [67] or centromere repositioning [69, 69].  
352 Interestingly, we could find two major groups of potential centromeric repeat units of different  
353 lengths, which did not always coincide. The location of the main occurrence of the centromere-  
354 defining repeat unit agreed well with the location previously inferred using chromosome  
355 preparations and fluorescence microscopy [62].

356

### 357 *Integration of organelle DNA in the nuclear genome*

358 Organelle DNA integration has been frequently found in all kingdoms of life for which high-resolution  
359 genomes are available [70-72]. It can be assumed that this transfer of organelle DNA to the nucleus is  
360 the seed of transfer of chloroplast genes to the nuclear genome [73]. However, apart from a few

361 hints [74] it is unclear, which factors stabilise the chloroplast genome so that its content in non-  
362 parasitic plants stays relatively stable over long evolutionary timescales [75, 76]. In the present study,  
363 it has been found that the insertion of organelle DNA insertions are located mainly in repeat-rich  
364 regions of the Beech genome. However, their presence in regions without pronounced repeat  
365 density might suggest that repeats are not the only factor associated with the insertion of organelle  
366 DNA. Nevertheless, it appears that some regions are generally amenable to the integration of  
367 organelle DNA, as in several cases chloroplast and mitochondrion insertions were observed in close  
368 proximity. The reason for this is unclear, but it is known that open chromatin is more likely to  
369 accumulate insertions [77]. The potential presence of areas in the genome that are less protected  
370 from the insertion of foreign DNA could open up potential molecular biology applications for creating  
371 stable transformants.

372 An anomaly regarding organelle DNA insertion was observed on chromosome 11. Around a central  
373 insertion of mitochondrion DNA, multiple insertions of chloroplast DNA were found. The whole  
374 region spans more than 2 Mb, which is significantly longer than the organelle integration hotspots  
375 reported in other species [70]. The evolutionary origin of this large chromosome region is unclear,  
376 but given its repetitive nature it is conceivable that it resulted from a combination of an integration  
377 of long fragments and repeat element activity.

378

### 379 *Distribution of single nucleotide polymorphisms (SNPs)*

380 SNP content was found to vary across all chromosomes leading to a mosaic pattern. While most of  
381 the areas of high or low SNP density were rather short and not correlated to any other patterns,  
382 there were several regions > 1 Mbp that exhibited a similar polymorphism type, suggesting non-  
383 neutral evolution.

384 The longest of those stretches poor in both heterozygous and homozygous positions was found on  
385 chromosome 4, and corresponded to a region rich in both genes and repeat elements. This is



386 remarkable and probably due to a recent proliferation, as repeat-rich regions are usually less stable  
387 and more prone to accumulate mutations [78-80].

388 Most regions with lower abundance of heterozygous SNPs than on average were found to be  
389 particularly high in homozygous SNPs. The longest of such stretches was found on chromosome 6,  
390 comprising about two thirds of the entire chromosome. Three more such regions longer than 5 Mbp  
391 were found on other chromosomes. The evolutionary significance of this is unclear, but it is  
392 conceivable that these areas contain locale specific variants for which no alternative alleles are  
393 shared within the same stand. For confirmation of this hypothesis, it would be important to evaluate  
394 genetic markers from additional individuals of the same stand. Locally adaptive alleles could be fixed  
395 relatively easy by local inbreeding [81], considering the low seed dispersion kernel of European  
396 Beech [82]. The presence of genes involved in local adaptation could explain the rather high amount  
397 of homozygous SNPs in the same location, as the stands from which the two studied individuals came  
398 from differ in soil, water availability, continentality, and light availability. However, more individuals  
399 from geographically separated similar stands need to be investigated to disentangle the effects of  
400 inbreeding and local adaptation.

401 In summary, homozygous and heterozygous SNPs were rather uniformly distributed throughout the  
402 major part of the genome, suggesting neutral evolution or balancing selection.

403

#### 404 **Conclusions**

405 The chromosome-level assembly of the ultra-centennial individual Bhaga from the Kellerwald-  
406 Edersee National Park in Germany and its comparison with the individual Jamy from the Jamy Nature  
407 Reserve in Poland has revealed several notable genomic features. The prediction of the telomeres  
408 and centromeres as well as ribosomal DNA corresponded well with data gained from chromosome  
409 imaging [62], suggesting state-of-the-art accuracy of the assembly. Interestingly, several anomalies  
410 were observed in the genome, corresponding to regions with abundant integrations of organelle

411 DNA, low frequency of both heterozygous and homozygous SNPs, and long chromosome stretches  
412 almost homozygous but with a high frequency of SNPs differentiating the individuals.

413 Taken together, the data presented here suggest a strongly partitioned genome architecture and  
414 potentially divergent selection regimes in the stands of the two individuals investigated here. Future  
415 comparisons of additional genomes to the reference will help understanding the significance of  
416 variant sites identified in this study and shed light on the fundamental processes involved in local  
417 adaptation of a long-lived tree species exposed to a changing climate.

418

#### 419 **Availability of Supporting Data and Materials**

420 The data sets supporting the results of this article are available in the GenBank repository, under the  
421 accession number PRJEB24056 for the *Fagus sylvatica* reference individual Bhaga and under the  
422 accession number PRJNA450822 for the individual Jamy.

423

#### 424 **Additional Files**

425 **Supplementary file 1.** Details of annotated repeat elements in *Fagus sylvatica*.

426 **Supplementary file 2.** Venn diagram showing shared PLAZA proteins of *Arabidopsis thaliana* (27615),  
427 *Eucalyptus grandis* (36331), and *Vitis vinifera* (26346) with those of *Fagus sylvatica* (28326).

428 **Supplementary file 3.** Centromeric feature annotation.

429 **Supplementary file 4.** Details of the conservation of organelle DNA insertions in the nuclear genome.

430

#### 431 **Competing Interests**

432 The authors declare that they have no competing interest.

433

#### 434 **Funding**

435 This study was supported by grants of the German Science Foundation (Th1632-18-1), National  
436 Science Centre, Poland (2012/04/A/NZ9/00500), the Polish Ministry of Science and Higher Education  
437 under the program “Regional Initiative of Excellence” in 2019–2022 (Grant No. 008/RID/2018/19),  
438 and the LOEWE initiative of the government of Hessen in the framework of the LOEWE Centre for  
439 Translational Biodiversity Genomics (TBG).

440

#### 441 **Authors’ Contributions**

442 M.T. conceived the study. B.U., J.B., J.M., M.T., and S.P. provided materials. B.U., J.M., and S.P.,  
443 conducted laboratory experiments. B.M., B.U., J.B., J.M., and M.T. analysed the data. B.M., B.U., J.B.,  
444 J.M., M.P., M.T, and S.W. interpreted the data. B.M. and M.T. wrote the manuscript with  
445 contributions from the other authors. All authors read and approved the final manuscript.

446

#### 447 **Acknowledgements**

448 The authors are grateful to the rangers of the Kellerwald-Edersee National Park for providing access  
449 to the reference individual Bhaga and the permission to sample.

450

#### 451 **References**

452 [1] Durrant TH, De Rigo D, Caudullo G. *Fagus sylvatica* in Europe: distribution, habitat, usage and  
453 threats. In: San-Miguel-Ayanz J, de Rigo D, Caudullo G, Durrant TH, Mauri A, editors.  
454 European atlas of forest tree species. Luxembourg: Publication Office of the European Union;  
455 2016, pp 94–5.

- 456 [2] Wagner S, Collet C, Madsen P, Nakashizuka T, Nyland RD, Sagheb-Talebi K. Beech regeneration  
457 research: from ecological to silvicultural aspects. *Forest Ecol Manag.* 2010;**259**(11):2172–82.
- 458 [3] Ligot G, Balandier P, Fayolle A, Lejeune P, Claessens H. Height competition between *Quercus*  
459 *petraea* and *Fagus sylvatica* natural regeneration in mixed and uneven-aged stands. *Forest*  
460 *Ecol Manag.* 2013;**304**:391–8.
- 461 [4] Di Filippo A, Biondi F, Maugeri M, Schirone B, & Piovesan G. Bioclimate and growth history affect  
462 beech lifespan in the Italian Alps and Apennines. *Glob Change Biol.* 2012;**18**(3):960–72.
- 463 [5] Leuschner C, Meier IC, Hertel D. On the niche breadth of *Fagus sylvatica*: soil nutrient status in 50  
464 Central European beech stands on a broad range of bedrock types. *Ann For Sci*  
465 2006;**63**(4):355–68.
- 466 [6] Jump AS, Hunt JM, & Penuelas J. Rapid climate change-related growth decline at the southern  
467 range edge of *Fagus sylvatica*. *Glob Change Biol* 2006;**12**(11):2163–74.
- 468 [7] Geßler A, Keitel C, Kreuzwieser J, Matyssek R, Seiler W, Rennenberg H. Potential risks for  
469 European beech (*Fagus sylvatica* L.) in a changing climate. *Trees* 2007;**21**(1):1–11.
- 470 [8] Coumou D, Rahmstorf S. A decade of weather extremes. *Nat Clim Change* 2012;**2**(7):491–6.
- 471 [9] Spinoni J, Naumann G, Vogt J, Barbosa P. European drought climatologies and trends based on a  
472 multi-indicator approach. *Global Planet Change* 2015;**127**:50–7.
- 473 [10] Albert REIF, Xystrakis F, Gaertner S, Sayer U. Floristic change at the drought limit of European  
474 beech (*Fagus sylvatica* L.) to downy oak (*Quercus pubescens*) forest in the temperate climate  
475 of central Europe. *Not Bot Horti Agrobi* 2017;**45**(2):646–54.
- 476 [11] Rose L, Leuschner C, Köckemann B, Buschmann H. Are marginal beech (*Fagus sylvatica* L.)  
477 provenances a source for drought tolerant ecotypes? *Eur J For Res* 2009;**128**(4):335–43.

- 478 [12] Bolte A, Degen B. Forest adaptation to climate change - options and limitations. *Landbauforsch*  
479 *Volk* 2010;**60**(3):111–7.
- 480 [13] Pfenninger M, Reuss F, Kiebler A, Schönnenbeck P, Caliendo C, Gerber S, et al. Genomic basis of  
481 drought resistance in *Fagus sylvatica*. *bioRxiv* 2020; doi: 10.1101/2020.12.04.411264.
- 482 [14] Atwell S, Huang YS, Vilhjálmsson BJ, Willems G, Horton M, Li Y, et al. Genome-wide association  
483 study of 107 phenotypes in *Arabidopsis thaliana* inbred lines. *Nature*. 2010;**465**(7298):627–  
484 31.
- 485 [15] Michael TP, VanBuren R. Building near-complete plant genomes. *Curr Opin Plant Biol*  
486 2020;**54**:26–33.
- 487 [16] Priest SJ, Yadav V, Heitman J. Advances in understanding the evolution of fungal genome  
488 architecture. *F1000Research* 2020;9(Faculty Rev):776.
- 489 [17] Rhie A, McCarthy SA, Fedrigo O, Damas J, Formenti G, Koren S, et al. Towards complete and  
490 error-free genome assemblies of all vertebrate species. *bioRxiv* 2020; doi:  
491 10.1101/2020.05.22.110833.
- 492 [18] Lieberman-Aiden E, Van Berkum NL, Williams L, Imakaev M, Ragozy T, Telling A, et al.  
493 Comprehensive mapping of long-range interactions reveals folding principles of the human  
494 genome. *Science* 2009;**326**(5950):289–93.
- 495 [19] Yin X, Arias-Pérez A, Kitapci TH, Hedgecock D. High-Density Linkage Maps Based on Genotyping-  
496 by-Sequencing (GBS) Confirm a Chromosome-Level Genome Assembly and Reveal Variation  
497 in Recombination Rate for the Pacific Oyster *Crassostrea gigas*. *G3 - Genes Genom Genet*  
498 2020;**10**(12):4691–705.
- 499 [20] Chen JD, Zheng C, Ma JQ, Jiang CK, Ercisli S, Yao MZ, et al. The chromosome-scale genome  
500 reveals the evolution and diversification after the recent tetraploidization event in tea plant.  
501 *Hortic Res* 2020;**7**(63):1–11.

- 502 [21] Jiang S, An H, Xu F, Zhang X. Chromosome-level genome assembly and annotation of the loquat  
503 (*Eriobotrya japonica*) genome. *GigaScience* 2020;**9**(3):giaa015.
- 504 [22] Marrano A, Britton M, Zaini PA, Zimin AV, Workman RE, Puiu D, et al. High-quality chromosome-  
505 scale assembly of the walnut (*Juglans regia* L.) reference genome. *GigaScience*  
506 2020;**9**(5):giaa050.
- 507 [23] Yang X, Kang M, Yang Y, Xiong H, Wang M, Zhang Z, et al. A chromosome-level genome assembly  
508 of the Chinese tupelo *Nyssa sinensis*. *Sci Data* 2019;**6**(282):1–7.
- 509 [24] Hong Z, Li J, Liu X, Lian J, Zhang N, Yang Z, et al. The chromosome-level draft genome of  
510 *Dalbergia odorifera*. *GigaScience* 2020;**9**(8): giaa084.
- 511 [25] Strijk JS, Hinsinger DD, Zhang F, Cao K. *Trochodendron aralioides*, the first chromosome-level  
512 draft genome in *Trochodendrales* and a valuable resource for basal eudicot research.  
513 *GigaScience* 2019;**8**(11): giz136.
- 514 [26] Yang FS, Nie S, Liu H, Shi TL, Tian XC, Zhou SS, et al. Chromosome-level genome assembly of a  
515 parent species of widely cultivated azaleas. *Nat Commun* 2020;**11**(1):1–13.
- 516 [27] Nong W, Law ST, Wong AY, Baril T, Swale T, Chu LM, et al. Chromosomal-level reference genome  
517 of the incense tree *Aquilaria sinensis*. *Mol Ecol Resour* 2020;**20**(4):971.
- 518 [28] Yang X, Yue Y, Li H, Ding W, Chen G, Shi T, et al. The chromosome-level quality genome provides  
519 insights into the evolution of the biosynthesis genes for aroma compounds of *Osmanthus*  
520 *fragrans*. *Hortic Res* 2018;**5**(72):1–13.
- 521 [29] Kremer A, Abbott AG, Carlson JE, Manos PS, Plomion C, Sisco P, et al. Genomics of *Fagaceae*.  
522 *Tree Genet Genomes* 2012;**8**(3):583–610.

- 523 [30] Sork VL, Squire K, Gugger PF, Steele SE, Levy ED, Eckert AJ. Landscape genomic analysis of  
524 candidate genes for climate adaptation in a California endemic oak, *Quercus lobata*.  
525 *American J Bot* 2016;**103**(1):33–46.
- 526 [31] Martínez-García PJ, Crepeau MW, Puiu D, Gonzalez-Ibeas D, Whalen J, Stevens KA, et al. The  
527 walnut (*Juglans regia*) genome sequence reveals diversity in genes coding for the  
528 biosynthesis of non-structural polyphenols. *Plant J* 2016;**87**(5):507–32.
- 529 [32] Plomion C, Aury JM, Amselem J, Alaeitabar T, Barbe V, Belser C, et al. Decoding the oak genome:  
530 public release of sequence data, assembly, annotation and publication strategies. *Mol Ecol*  
531 *Resour* 2016;**16**(1):254–65.
- 532 [33] Mishra B, Gupta DK, Pfenninger M, Hickler T, Langer E, Nam B, et al. A reference genome of the  
533 European beech (*Fagus sylvatica* L.). *GigaScience* 2018;**7**(6):giy063.
- 534 [34] Mishra B, Ulaszewski B, Ploch S, Burczyk J, & Thines M. A Circular Chloroplast Genome of *Fagus*  
535 *sylvatica* Reveals High Conservation between Two Individuals from Germany and One  
536 Individual from Poland and an Alternate Direction of the Small Single-Copy Region. *Forests*.  
537 2021;**12**(2):180.
- 538 [35] Ye C, Hill CM, Wu S, Ruan J, Ma ZS. DBG2OLC: efficient assembly of large genomes using long  
539 erroneous reads of the third generation sequencing technologies. *Sci Rep* 2016;**6**(1):1–9.
- 540 [36] Altschul SF, Gish W, Miller W, Myers EW & Lipman DJ. Basic local alignment search tool. *J Mol*  
541 *Biol.* 1990;**215**(3):403–10.
- 542 [37] Zhang X, Zhang S, Zhao Q, Ming R, Tang H. Assembly of allele-aware, chromosomal-scale  
543 autopolyploid genomes based on Hi-C data. *Nat Plants* 2019;**5**(8):833–45.
- 544 [38] Langmead B, Salzberg SL. Fast gapped-read alignment with Bowtie 2. *Nat Methods*  
545 2012;**9**(4):357–9.

- 546 [39] Walker BJ, Abeel T, Shea T, Priest M, Abouelliel A, Sakthikumar S, et al. Pilon: an integrated tool  
547 for comprehensive microbial variant detection and genome assembly improvement. *PloS*  
548 *ONE* 2014;**9**(11):e112963.
- 549 [40] Seppey M, Manni M, & Zdobnov EM. BUSCO: assessing genome assembly and annotation  
550 completeness. In: Kollmar M, editors. *Gene Prediction. Methods in Molecular Biology*, vol  
551 1962. New York: Humana. 2019. pp 227–45.
- 552 [41] Kim D, Langmead B, Salzberg SL. HISAT: a fast spliced aligner with low memory requirements.  
553 *Nat Methods* 2015;**12**(4):357–60.
- 554 [42] Li H, Handsaker B, Wysoker A, Fennell T, Ruan J, Homer N, et al. The sequence alignment/map  
555 format and SAMtools. *Bioinf* 2009;**25**(16):2078–2079.
- 556 [43] OmicsBox - Bioinformatics Made Easy, BioBam Bioinformatics, March 3, 2019,  
557 <https://www.biobam.com/omicsbox>
- 558 [44] Stanke M, Morgenstern B. AUGUSTUS: a web server for gene prediction in eukaryotes that  
559 allows user-defined constraints. *Nucleic Acids Res* 2005;**33**(suppl\_2):W465–7.
- 560 [45] PLAZA 4.0: an integrative resource for functional, evolutionary and comparative plant genomics  
561 *Nucleic Acids Res* (online access). Accessed 21<sup>st</sup> October, 2020.
- 562 [46] Li W, Godzik A. Cd-hit: a fast program for clustering and comparing large sets of protein or  
563 nucleotide sequences. *Bioinf* 2006;**22**(13):1658–9.
- 564 [47] Fu L, Niu B, Zhu Z, Wu S, Li W. CD-HIT: accelerated for clustering the next-generation sequencing  
565 data. *Bioinformatics*. 2012;**28**(23):3150–2.
- 566 [48] Rice P, Longden I, Bleasby A. EMBOSS: the European molecular biology open software suite.  
567 *Trends Genet* 2000;**16**(6):276–7.
- 568 [49] NCBI nr database <https://ftp.ncbi.nlm.nih.gov/blast/db/> accessed on 24<sup>th</sup> of June 2020.



- 569 [50] Buchfink B, Xie C, Huson DH. Fast and sensitive protein alignment using DIAMOND. *Nat Meth.*  
570 2015;**12**:59–60.
- 571 [51] Jones P, Binns D, Chang H, Fraser M, Li W, McAnulla C, et al. InterProScan 5: genome-scale  
572 protein function classification. *Bioinf* 2014;**30**(9):1236–40.
- 573 [52] Götz S, García-Gómez JM, Terol J, Williams TD, Nagaraj SH, Nueda MJ, et al. High-throughput  
574 functional annotation and data mining with the Blast2GO suite. *Nucleic Acids Res*  
575 2008;**36**(10):3420–35.
- 576 [53] Price AL, Jones NC, Pevzner PA. De novo identification of repeat families in large genomes. *Bioinf*  
577 2005;**21**(suppl\_1):i351–8.
- 578 [54] Smit AFA, Hubley R. RepeatMasker Open-4.0.5. 2007–2014; <http://www.repeatmasker.org>.  
579 Accessed 16 Nov 2020.
- 580 [55] Flynn JM, Hubley R, Goubert C, Rosen J, Clark AG, Feschotte C, Smit AF. RepeatModeler2 for  
581 automated genomic discovery of transposable element families. *PNAS* 2020;**117**(17):9451–7.
- 582 [56] Tarailo-Graovac M, Chen N. Using RepeatMasker to identify repetitive elements in genomic  
583 sequences. *Curr Prot Bioinf* 2009;**25**(1):4.10.1–4.10.14.
- 584 [57] Benson G. Tandem repeats finder: a program to analyze DNA sequences. *Nucleic Acids Res*  
585 1999;**27**(2):573–80.
- 586 [58] Ayad LA, Pissis SP. MARS: improving multiple circular sequence alignment using refined  
587 sequences. *BMC Genomics* 2017;**18**(86):1–10.
- 588 [59] Chen S, Huang T, Zhou Y, Han Y, Xu M, Gu J. AfterQC: automatic filtering, trimming, error  
589 removing and quality control for fastq data. *BMC Bioinf* 2017;**18**(3):80. doi:10.1186/s12859-  
590 017-1469-3

- 591 [60] Li H. A statistical framework for SNP calling, mutation discovery, association mapping and  
592 population genetical parameter estimation from sequencing data. *Bioinf* 2011;**27**(21):2987–  
593 93.
- 594 [61] Buels R, Yao E, Diesh CM, Hayes RD, Munoz-Torres M, Helt G, et al. JBrowse: a dynamic web  
595 platform for genome visualization and analysis. *Genome Biol* 2016;**17**(66):1–12.
- 596 [62] Ribeiro T, Loureiro J, Santos C, Morais-Cecílio L. Evolution of rDNA FISH patterns in the *Fagaceae*.  
597 *Tree Genet & Genomes*. 2011;**7**(6):1113-22.
- 598 [63] Ning DL, Wu T, Xiao LJ, Ma T, Fang WL, Dong RQ, & Cao FL. Chromosomal-level assembly of  
599 *Juglans sigillata* genome using Nanopore, BioNano, and Hi-C analysis. *GigaScience*  
600 2020;**9**(2):giaa006.
- 601 [64] Zhu T, Wang L, You FM, Rodriguez JC, Deal KR, Chen L, et al. Sequencing a *Juglans regia* × *J.*  
602 *microcarpa* hybrid yields high-quality genome assemblies of parental species. *Hortic Res*  
603 2019;**6**(55):1–16.
- 604 [65] Aird D, Ross MG, Chen WS, Danielsson M, Fennell T, Russ C, et al. Analyzing and minimizing PCR  
605 amplification bias in Illumina sequencing libraries. *Genome Biol* 2011;**12**(R18):1–14.
- 606 [66] Dohm JC, Lottaz C, Borodina T, Himmelbauer H. Substantial biases in ultra-short read data sets  
607 from high-throughput DNA sequencing. *Nucleic Acids Res* 2008;**36**(16):e105.
- 608 [67] Alves S, Ribeiro T, Inácio V, Rocheta M, Morais-Cecílio L. Genomic organization and dynamics of  
609 repetitive DNA sequences in representatives of three *Fagaceae* genera. *Genome*.  
610 2012;**55**(5):348–59.
- 611 [68] Mandáková T, Hloušková P, Koch MA, Lysak MA. Genome evolution in *Arabideae* was marked by  
612 frequent centromere repositioning. *Plant Cell* 2020;**32**(3):650–65.

- 613 [69] Klein SJ, O'Neill RJ. Transposable elements: genome innovation, chromosome diversity, and  
614 centromere conflict. *Chromosome Res* 2018;**26**(1):5–23.
- 615 [70] Zhang GJ, Dong R, Lan LN, Li SF, Gao WJ, Niu HX. Nuclear integrants of organellar DNA contribute  
616 to genome structure and evolution in plants. *Int J Mol Sci* 2020;**21**(3):707.
- 617 [71] Guo X, Ruan S, Hu W, Cai D, Fan L. Chloroplast DNA insertions into the nuclear genome of rice:  
618 the genes, sites and ages of insertion involved. *Funct Integr Genomic* 2008;**8**(2):101–8.
- 619 [72] Stegemann S, Hartmann S, Ruf S, Bock R. High-frequency gene transfer from the chloroplast  
620 genome to the nucleus. *PNAS* 2003;**100**(15):8828–33.
- 621 [73] Huang CY, Ayliffe MA, & Timmis JN. Direct measurement of the transfer rate of chloroplast DNA  
622 into the nucleus. *Nature* 2003;**422**(6927):72–6.
- 623 [74] Yang Z, Hou Q, Cheng L, Xu W, Hong Y, Li S, et al. RNase H1 cooperates with DNA gyrases to  
624 restrict R-loops and maintain genome integrity in *Arabidopsis* chloroplasts. *Plant Cell*  
625 2017;**29**(10):2478–97.
- 626 [75] Xiong AS, Peng RH, Zhuang J, Gao F, Zhu B, Fu XY, et al. Gene duplication, transfer, and evolution  
627 in the chloroplast genome. *Biotechnol Adv* 2009;**27**(4):340–7.
- 628 [76] Wang D, Wu YW, Shih ACC, Wu CS, Wang YN, & Chaw SM. Transfer of chloroplast genomic DNA  
629 to mitochondrial genome occurred at least 300 MYA. *Mol Biol Evol* 2007;**24**(9):2040–8.
- 630 [77] Wang D, & Timmis JN. Cytoplasmic organelle DNA preferentially inserts into open chromatin.  
631 *Genome Biol Evol* 2013;**5**(6):1060–4.
- 632 [78] Wang L, Sun Y, Sun X, Yu L, Xue L, He Z, et al. Repeat-induced point mutation in *Neurospora*  
633 *crassa* causes the highest known mutation rate and mutational burden of any cellular life.  
634 *Genome Biol* 2020;**21**(142):1–23.

- 635 [79] Flynn JM, Lower SE, Barbash DA, Clark AG. Rates and patterns of mutation in tandem repetitive  
636 DNA in six independent lineages of *Chlamydomonas reinhardtii*. *Genome Biol Evol*  
637 2018;**10**(7):1673–86.
- 638 [80] Ho EK, Bellis ES, Calkins J, Adrion JR, Latta LC, Schaack S. Engines of change: Transposable  
639 element mutation rates are high and vary widely among genotypes and populations of  
640 *Daphnia magna*. *bioRxiv* 2020; doi: 10.1101/2020.09.21.307181.
- 641 [81] Ceballos FC, Joshi PK, Clark DW, Ramsay M, Wilson JF. Runs of homozygosity: windows into  
642 population history and trait architecture. *Nat Rev Gen* 2018;**19**(4):220.
- 643 [82] Martínez I, González-Taboada F. Seed dispersal patterns in a temperate forest during a mast  
644 event: performance of alternative dispersal kernels. *Oecologia* 2009;**159**(2):389–400.
- 645 [83] Wang J, Tian S, Sun X, Cheng X, Duan N, Tao J, Shen G. Construction of Pseudomolecules for the  
646 Chinese Chestnut (*Castanea mollissima*) Genome. *G3* 2020;**10**(10):3565–74.

647

648

## 649 Tables

650 **Table 1.** Comparison of BUSCO completeness in Fagaceae genomes available and in the present  
651 study (*Fagus sylvatica* V2).

| Species                         | Complete | Single | Duplicated | Fragmented | Missing |
|---------------------------------|----------|--------|------------|------------|---------|
| <i>Fagus sylvatica</i> V2       | 97.4%    | 90.3%  | 7.1%       | 1.3%       | 1.3%    |
| <i>Fagus sylvatica</i> V1 [33]  | 96.6%    | 85.6%  | 11%        | 1.8%       | 1.6%    |
| <i>Castanea mollissima</i> [83] | 92.4%    | 88.8%  | 3.7%       | 1.5%       | 6.1%    |

*Quercus lobata* [30] v3                      93.5%                      87.6%                      5.9%                      1.0%                      5.5%

652

653

654 **Table 2.** Distribution of exons in *Fagus sylvatica* in comparison to *Juglans regia* and *Arabidopsis*  
655 *thaliana*.

| Species                                        | Minimum<br>exons /<br>gene | First<br>quartile | Mean<br>exons /<br>gene | Median<br>exons /<br>gene | Third<br>quartile | Maximum<br>exons /<br>gene |
|------------------------------------------------|----------------------------|-------------------|-------------------------|---------------------------|-------------------|----------------------------|
| <i>Fagus sylvatica</i> v2                      | 1                          | 2                 | 4.916                   | 4                         | 7                 | 70                         |
| <i>Juglans regia</i> [31]                      | 1                          | 2                 | 5.301                   | 4                         | 7                 | 70                         |
| <i>Arabidopsis thaliana</i><br>[GCA_000001735] | 1                          | 1                 | 5.299                   | 4                         | 7                 | 79                         |

656

657

658

659 **Figure captions**

660 **Fig. 1.** The more than 300 year-old *Fagus sylvatica* reference individual Bhaga on a cliff over the  
661 Edersee in the Kellerwald Edersee National Park (Germany)

662 **Fig. 2.** Locations of probable centromeric repeats on the chromosomes presented as red lines and  
663 telomeric locations as blue line on the chromosomes.

664

665 **Fig. 3.** Chloroplast genome insertions within 100 kb windows on the chromosomes. Each  
666 chromosome is represented as three rows, the first with insertions more than 100 bp long, the  
667 second row with more than 1 kb and the third with more than 10 kb.

668 **Fig. 4.** Mitochondrion genome insertions within 100 kb windows on the chromosomes. Each  
669 chromosome is represented as three rows, the first with insertions more than 100 bp long, the  
670 second row with more than 1 kb and the third with more than 10 kb.

671 **Fig. 5.** Repeat regions, coding regions, and regions coding for genes present within 100 kb windows  
672 on the chromosomes.

673 **Fig. 6.** *Fagus sylvatica* Homozygous and Heterozygous SNPs present within 100 kb windows on the  
674 chromosomes.

675 **Fig. 7:** Distribution of homozygous and heterozygous SNPS in non-overlapping 100 kb windows.

676

677

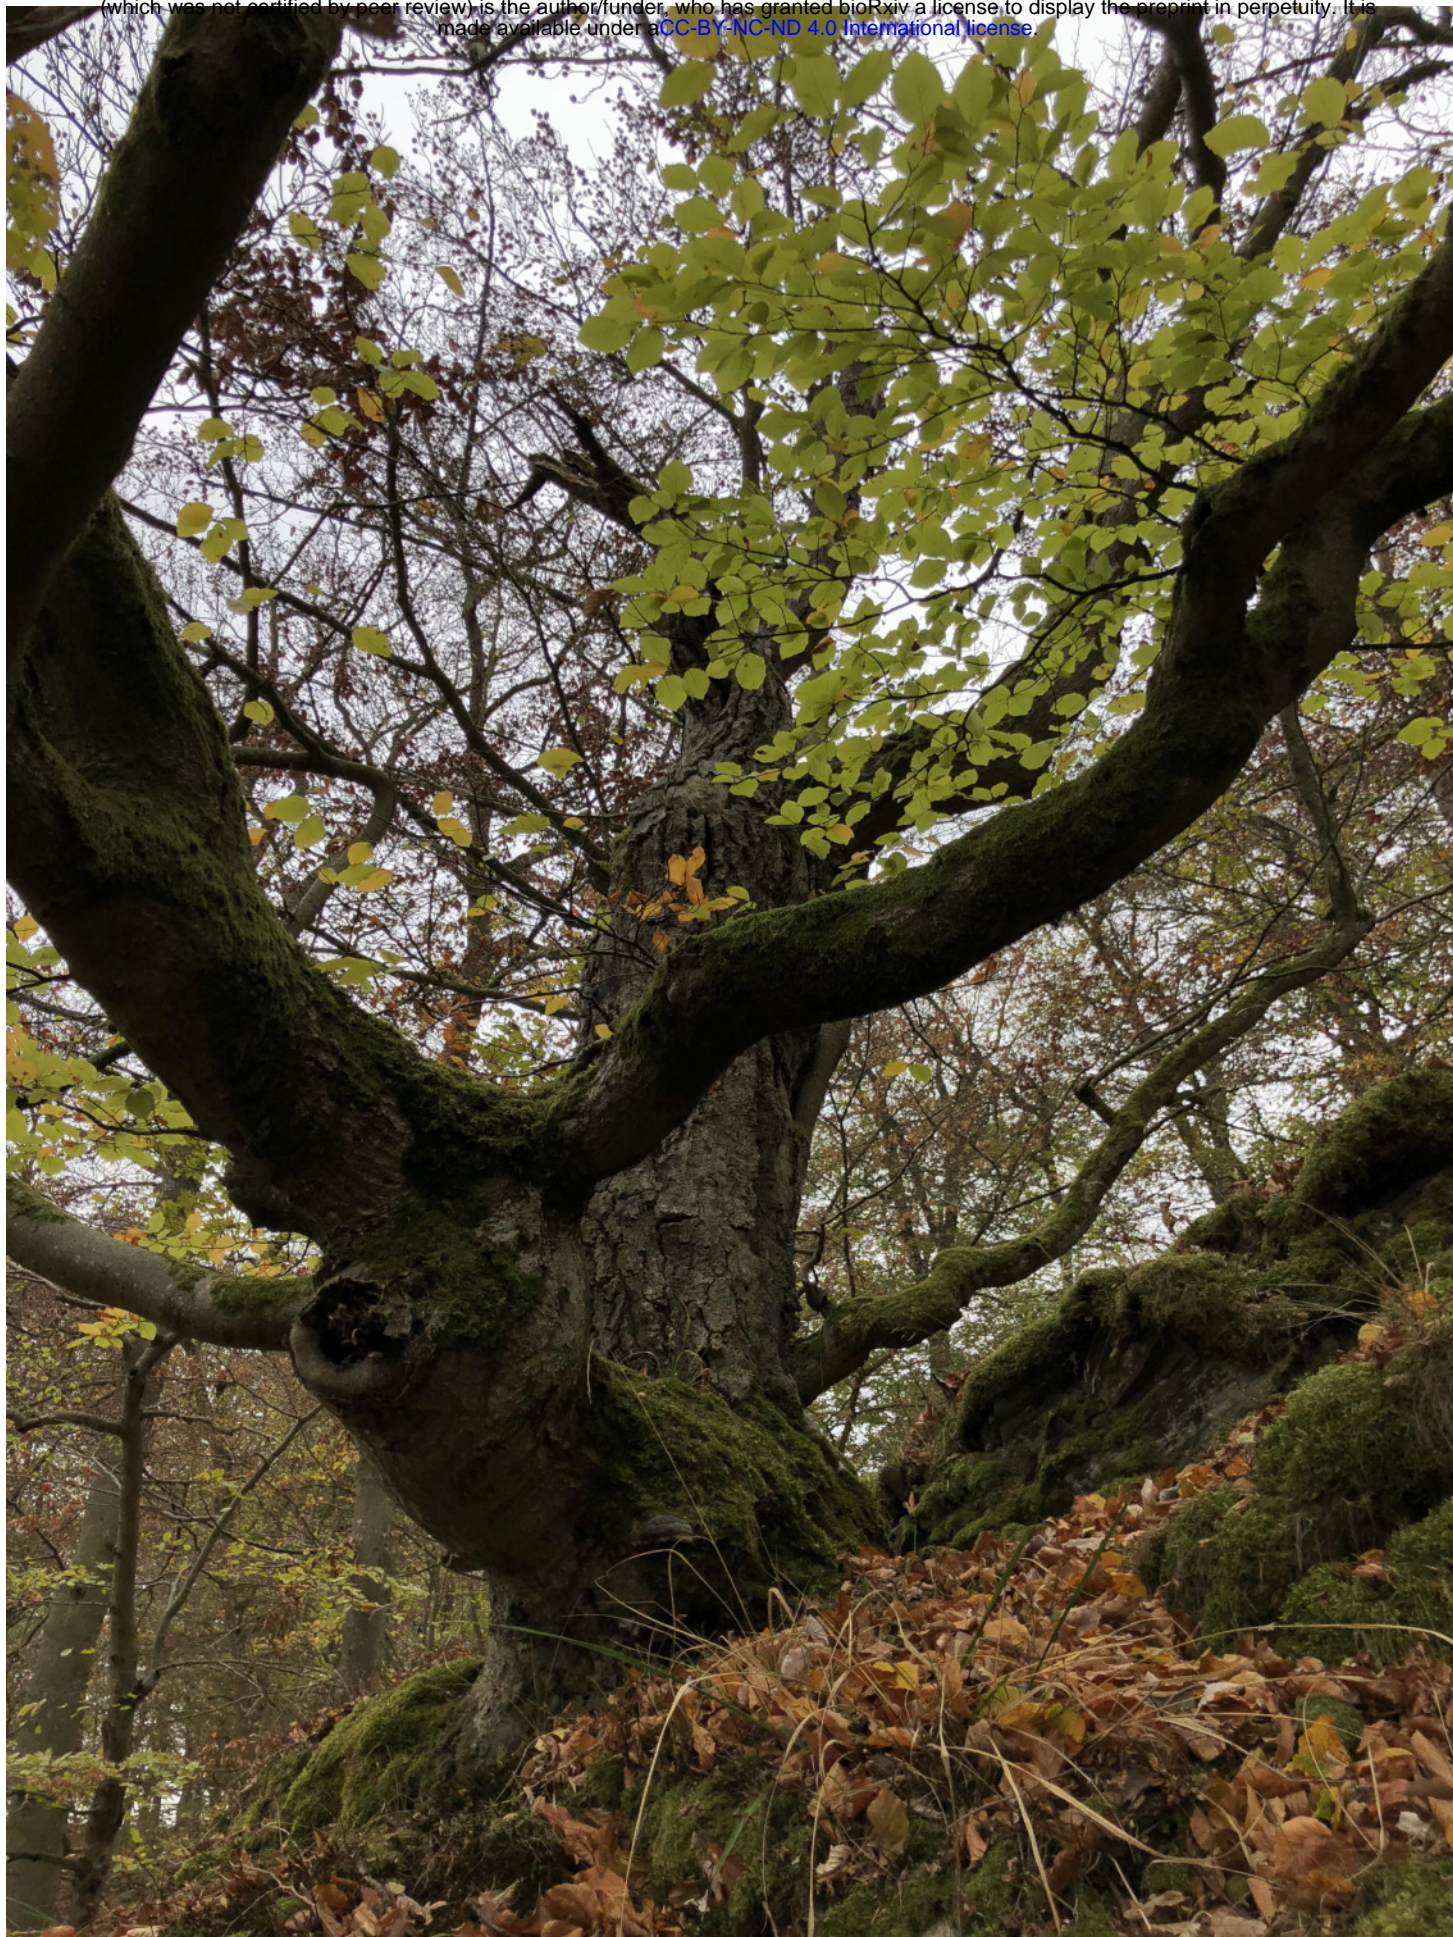

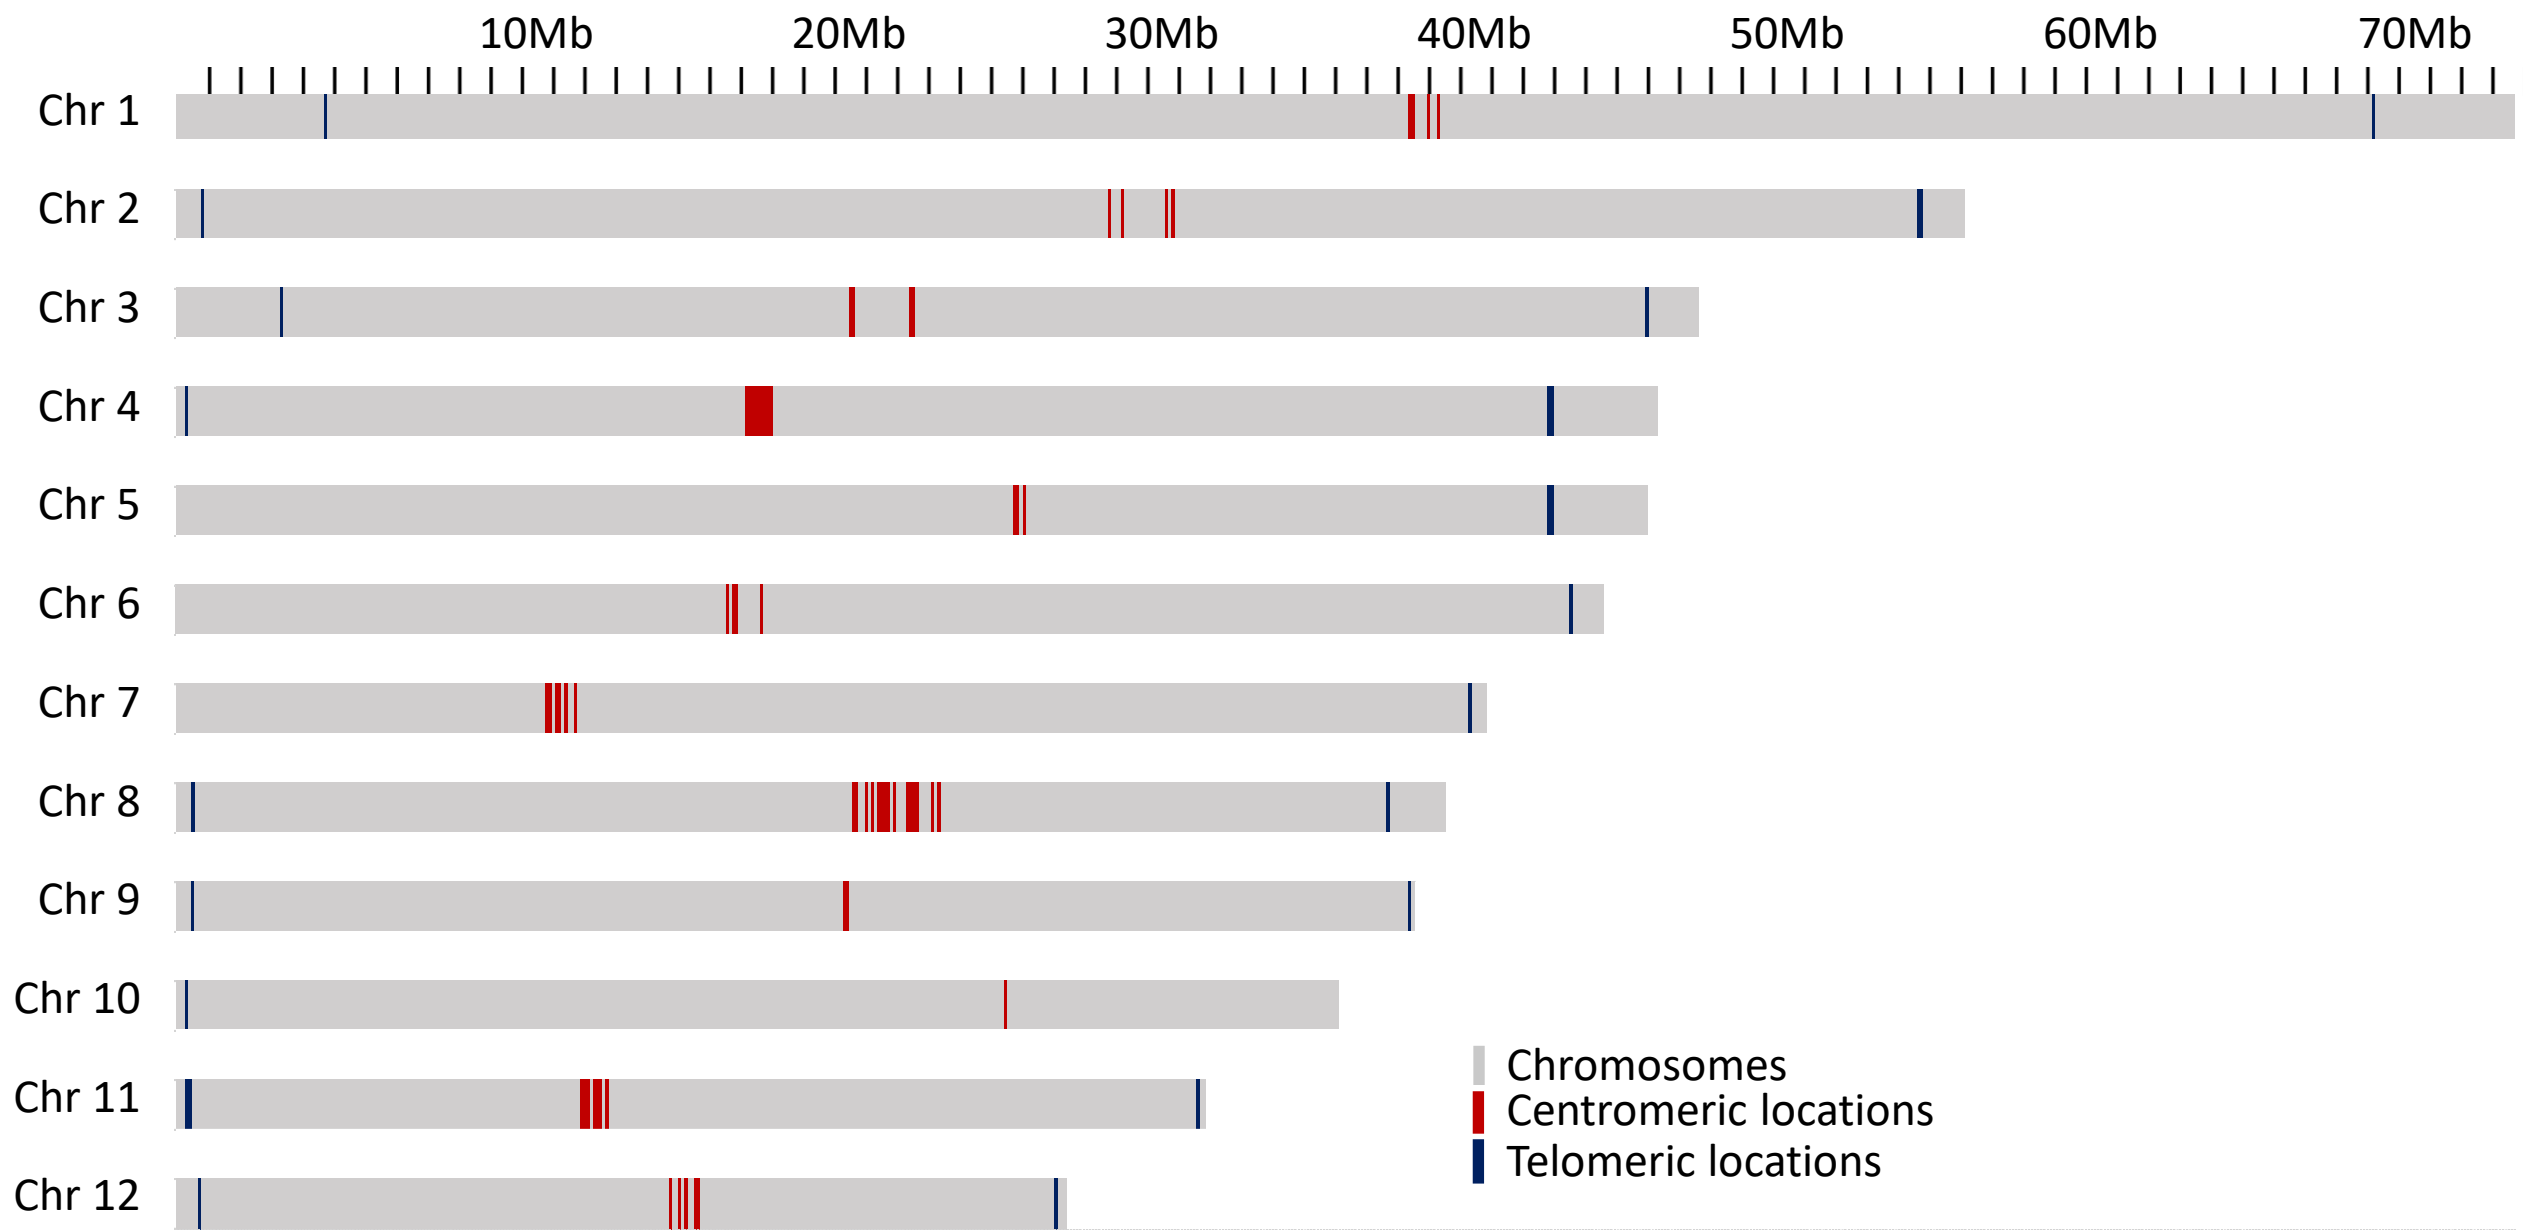



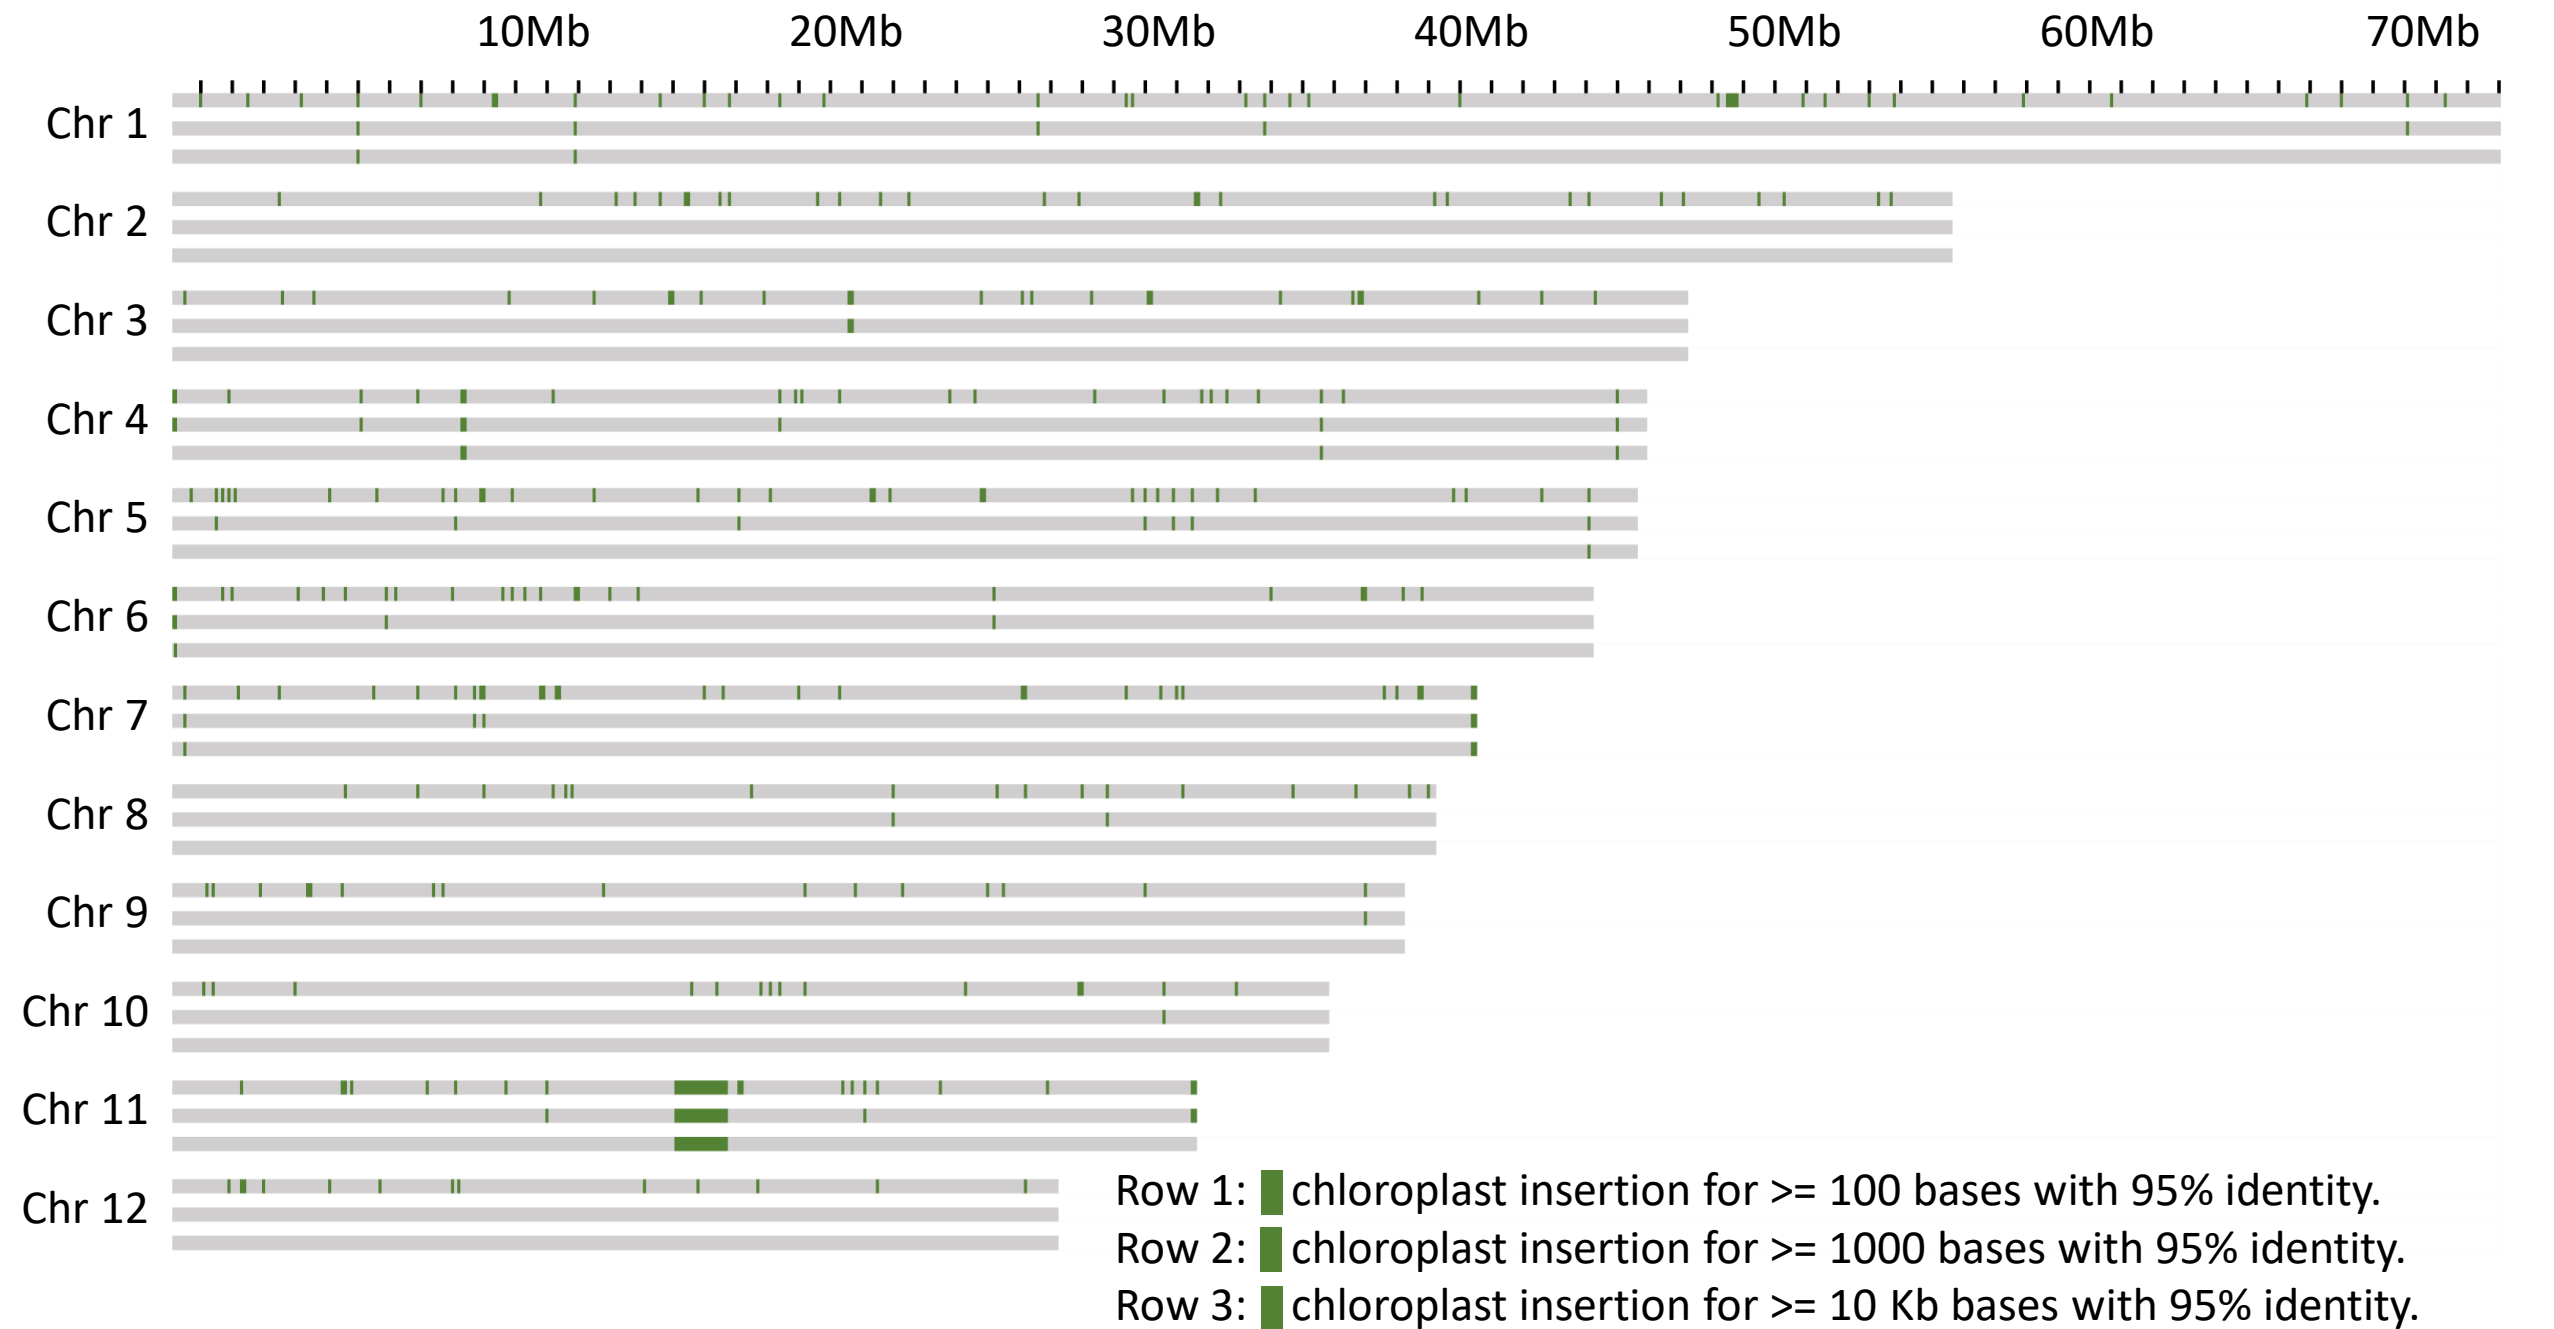

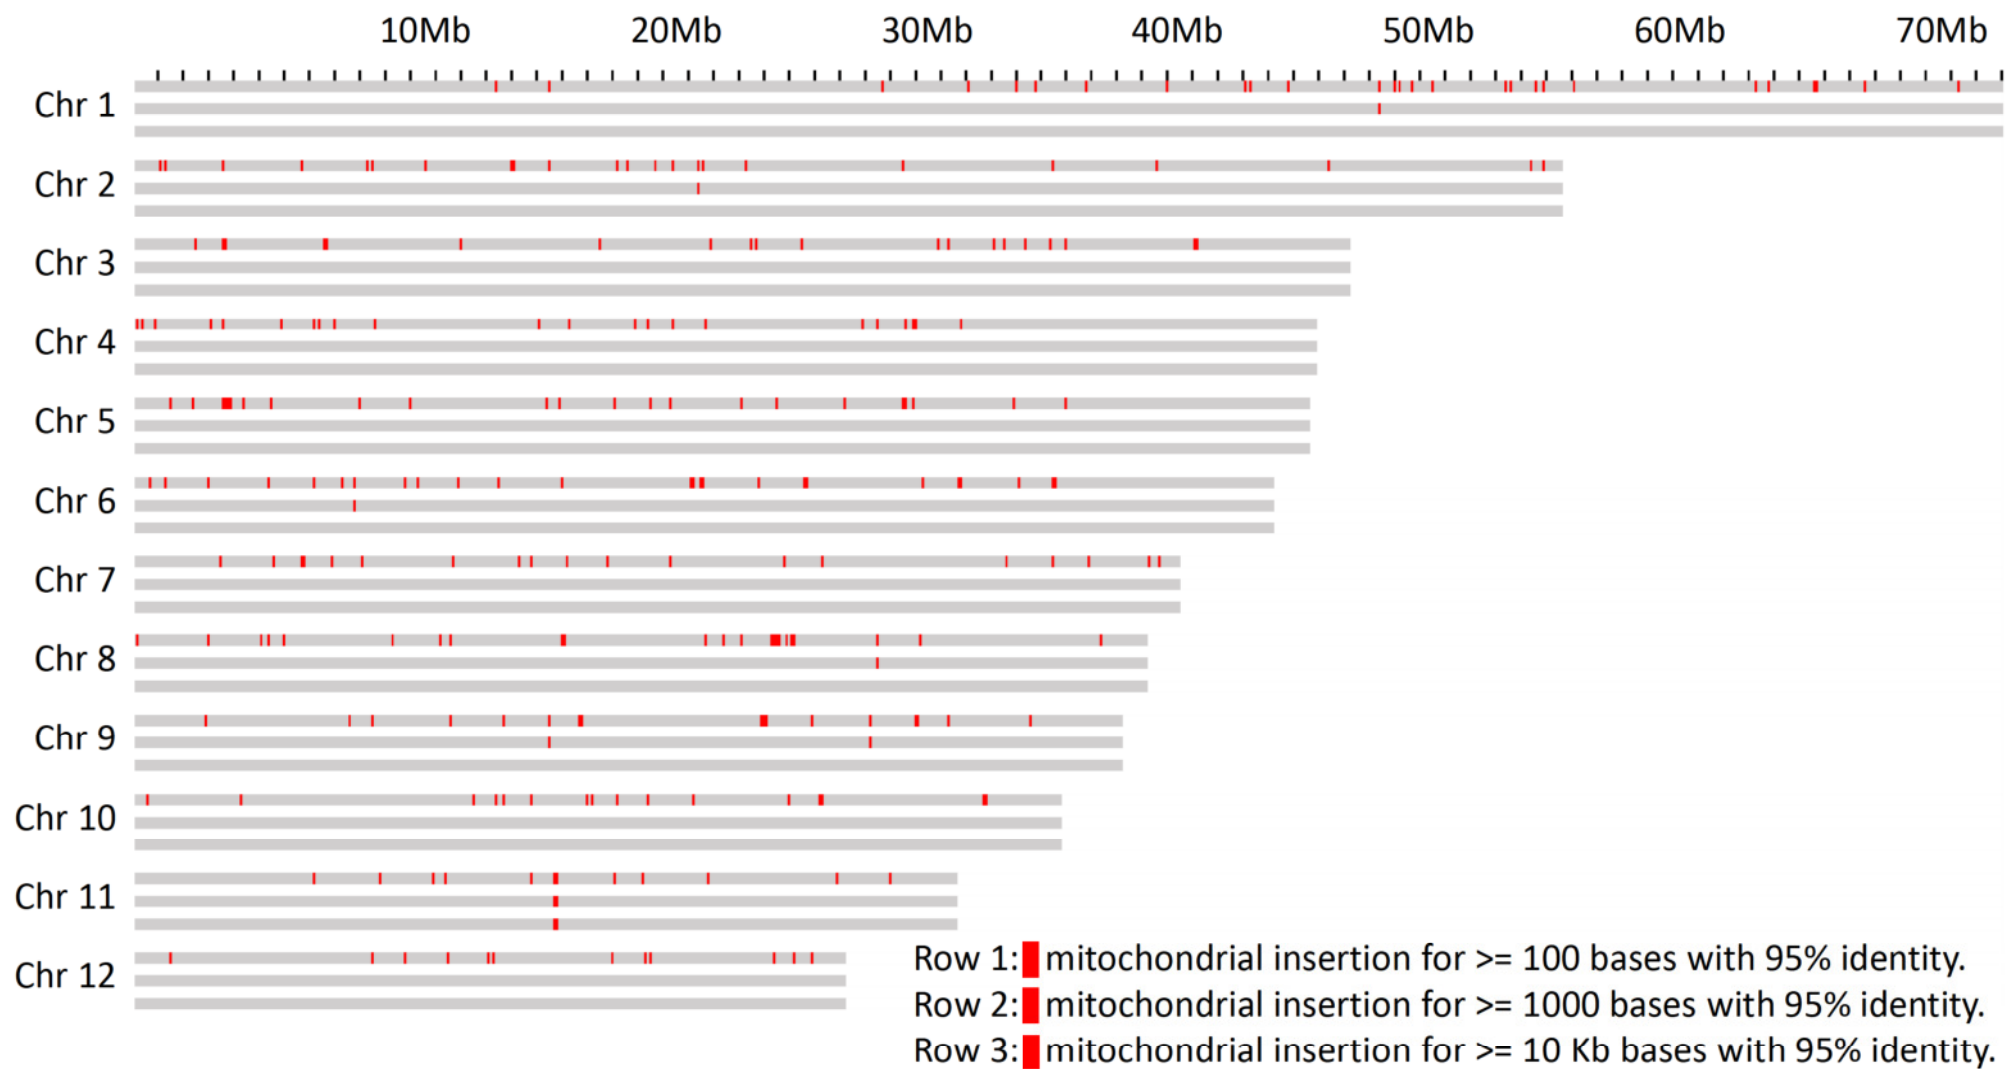

10Mb

20Mb

30Mb

40Mb

50Mb

60Mb

70Mb

Chr 1

Chr 2

Chr 3

Chr 4

Chr 5

Chr 6

Chr 7

Chr 8

Chr 9

Chr 10

Chr 11

Chr 12

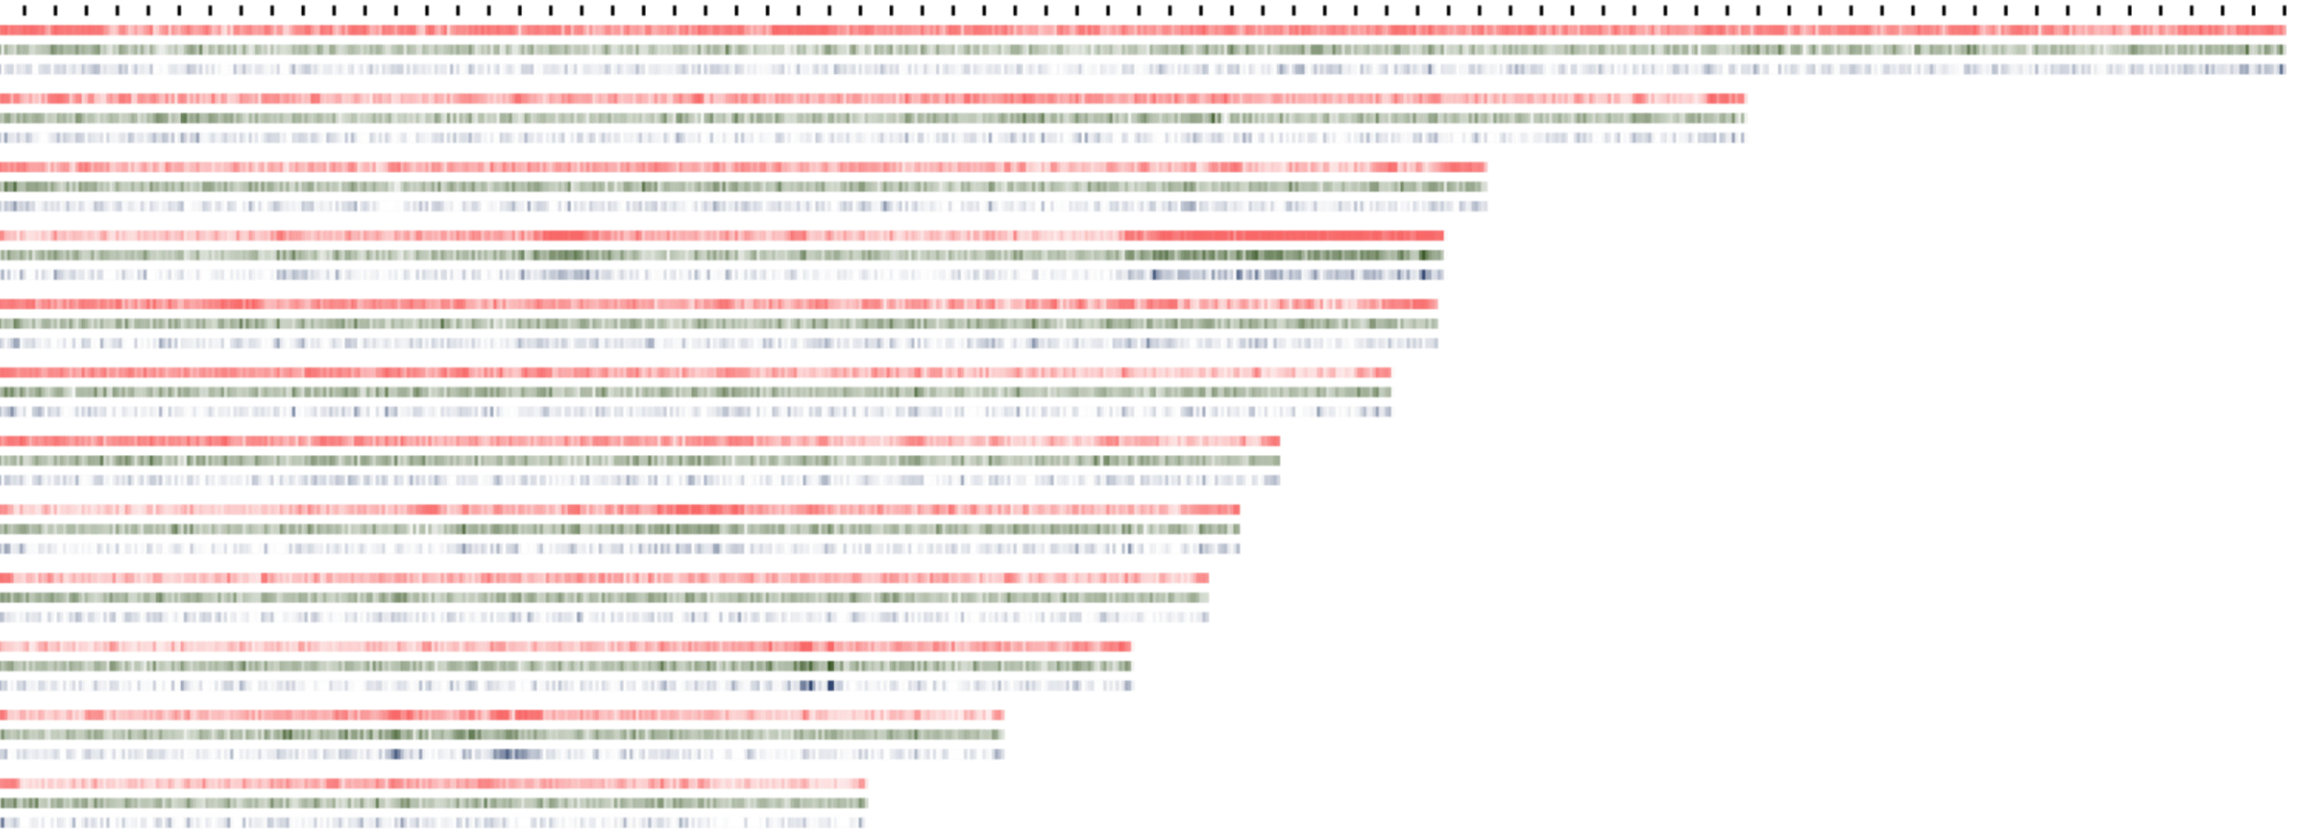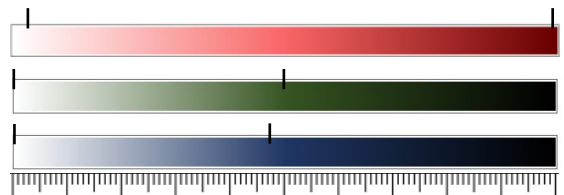

Repeat region per 100 Kb (2694 - 99857)

Coding region per 100Kb (0 - 49668)

Coding region of duplicated genes per 100Kb (0 - 47227)

10Mb

20Mb

30Mb

40Mb

50Mb

60Mb

70Mb

Chr 1

Chr 2

Chr 3

Chr 4

Chr 5

Chr 6

Chr 7

Chr 8

Chr 9

Chr 10

Chr 11

Chr 12

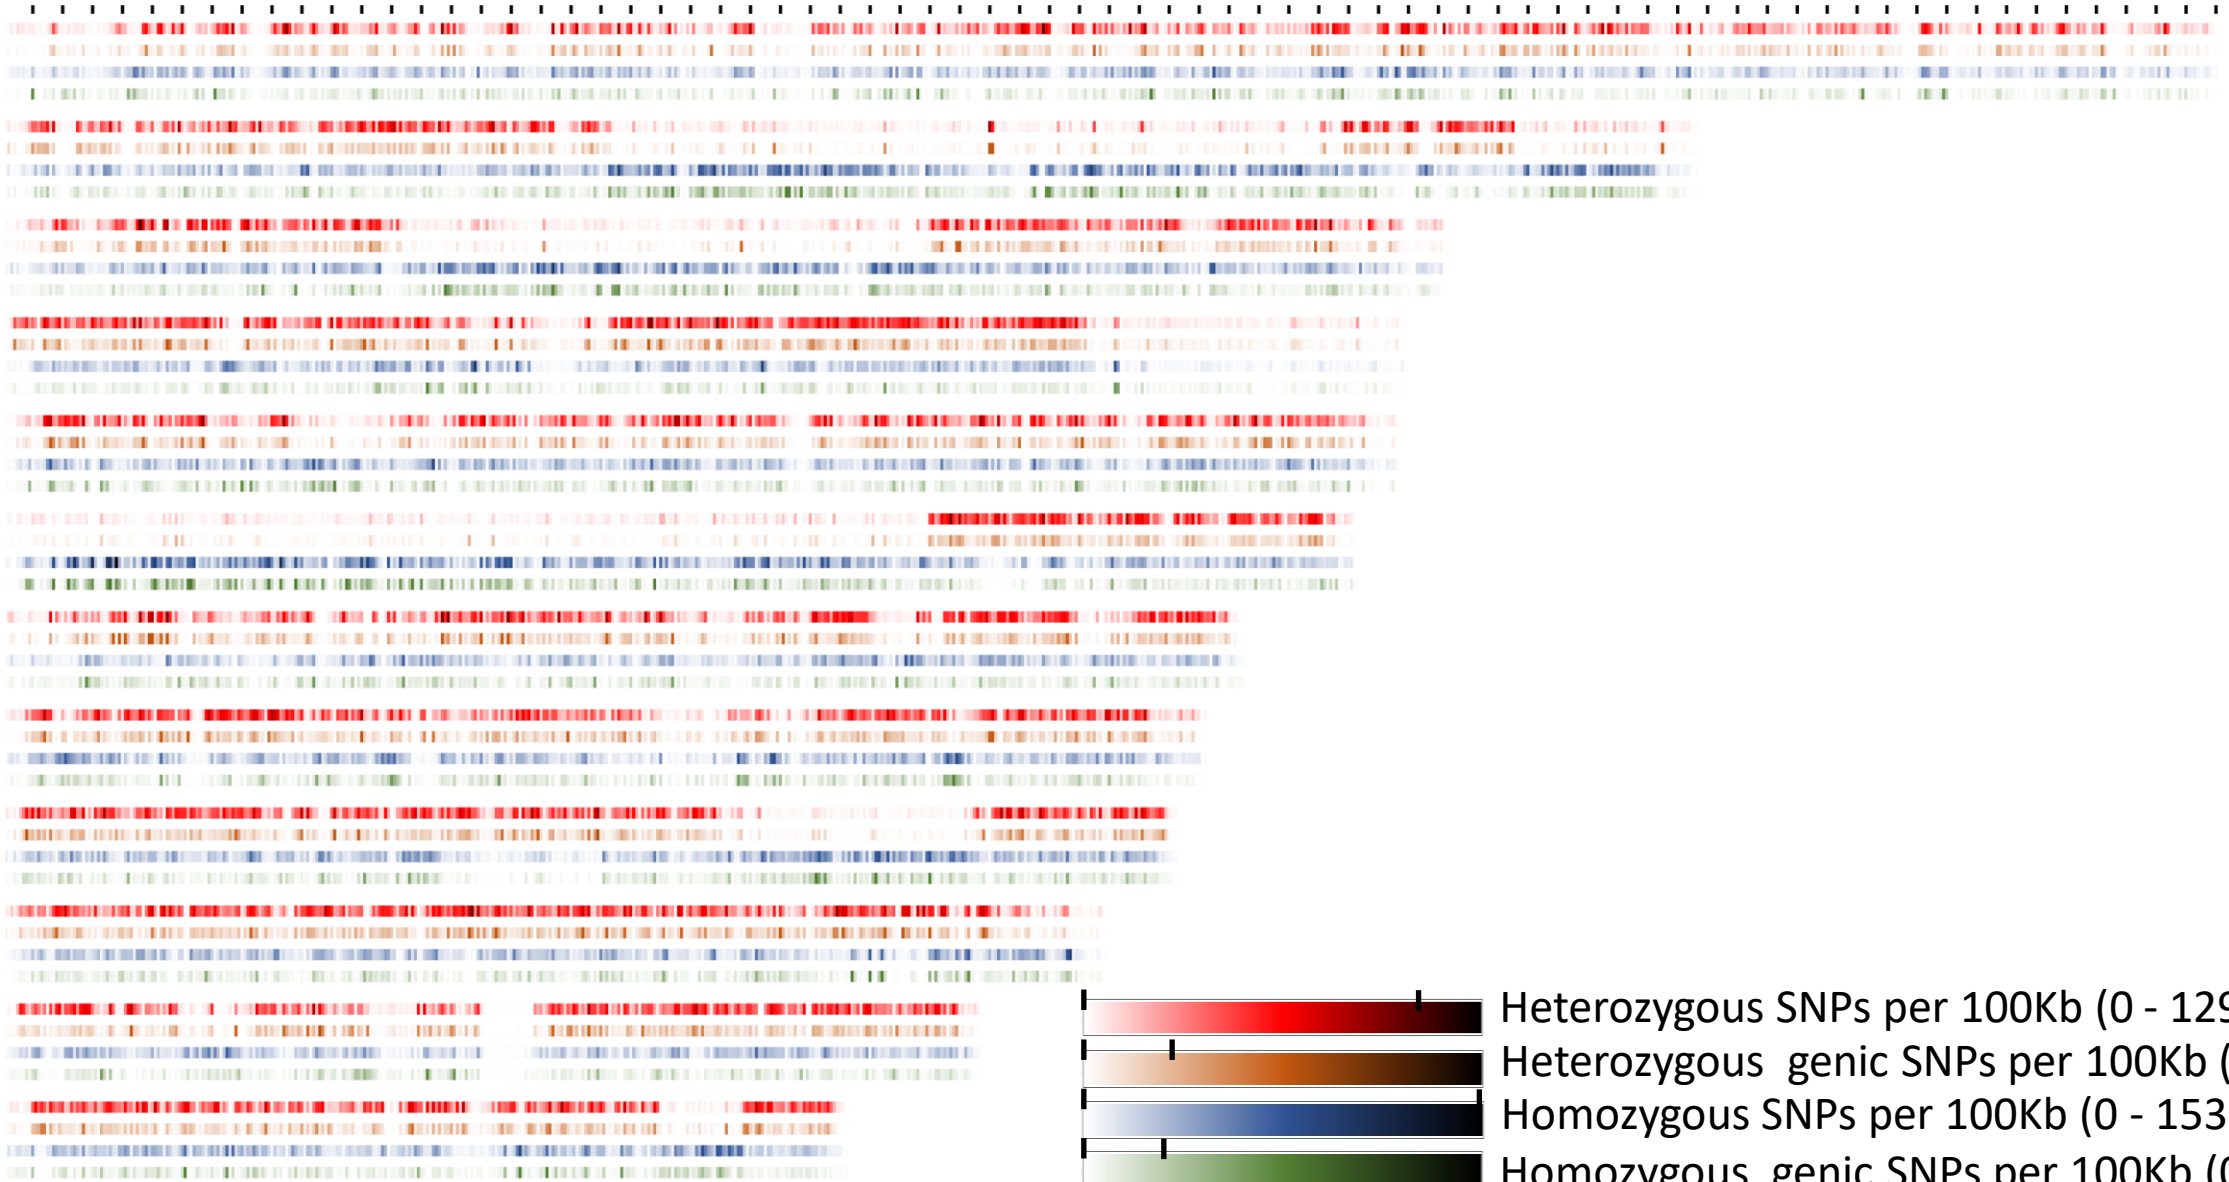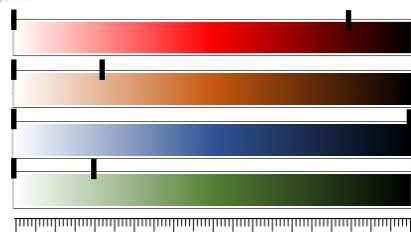

Heterozygous SNPs per 100Kb (0 - 1294)

Heterozygous genic SNPs per 100Kb (0 - 331)

Homozygous SNPs per 100Kb (0 - 1532)

Homozygous genic SNPs per 100Kb (0 - 310)

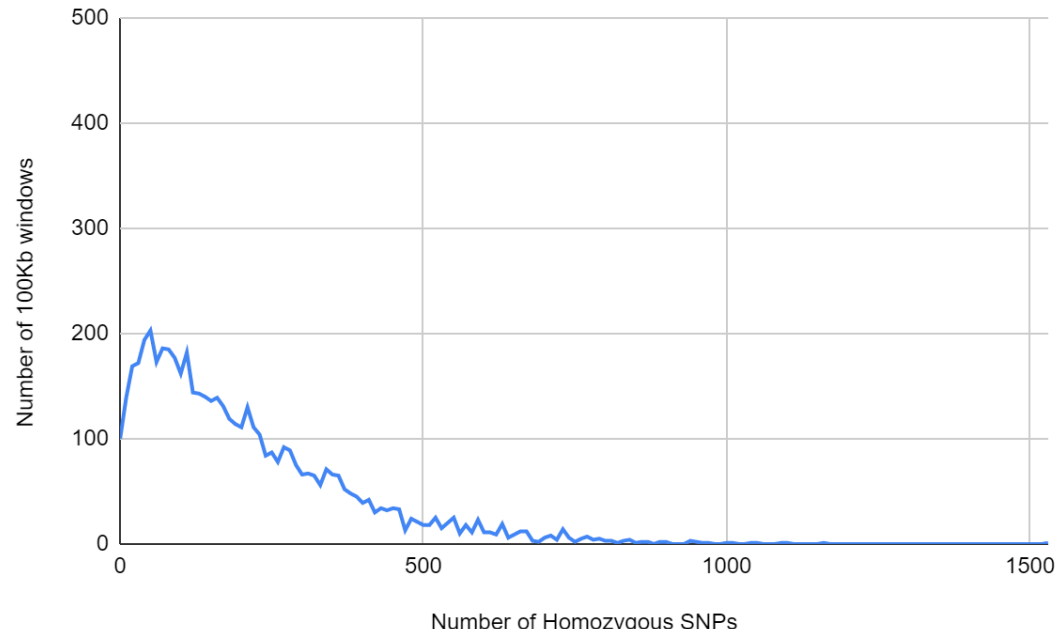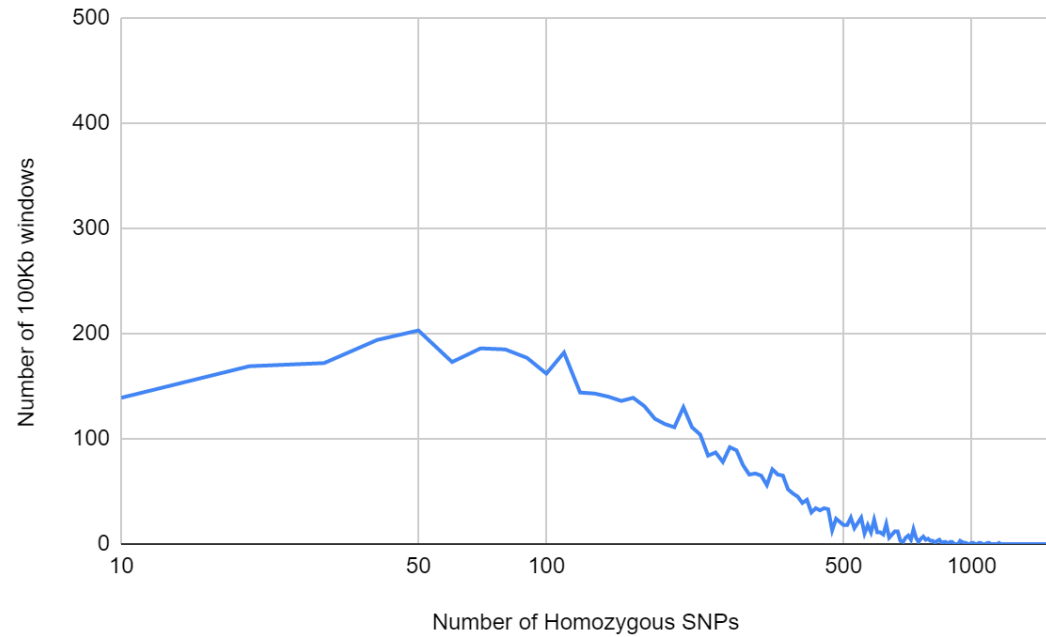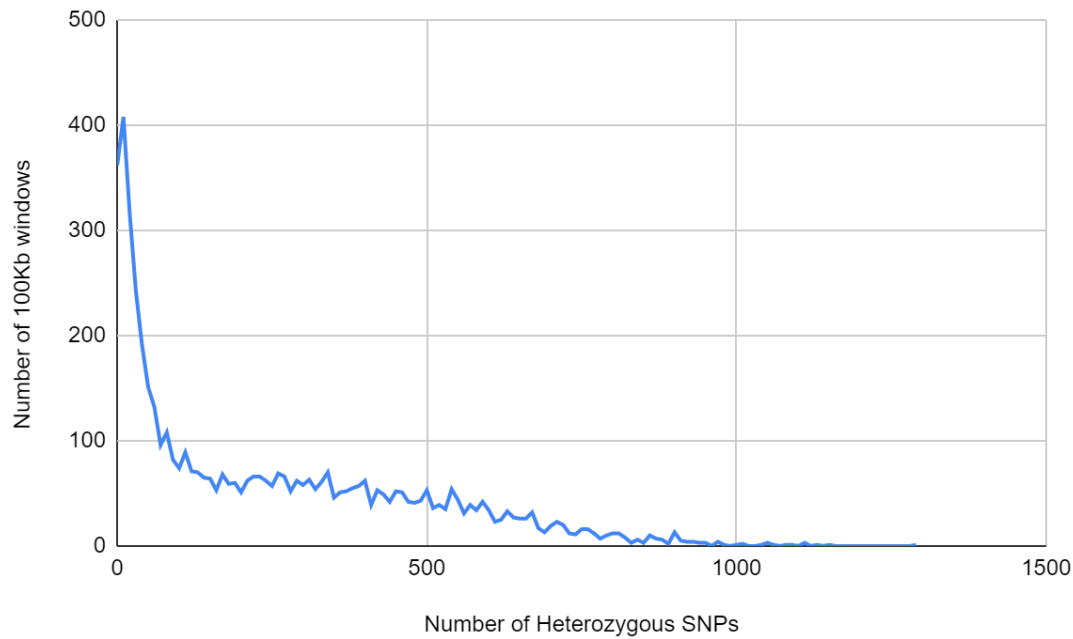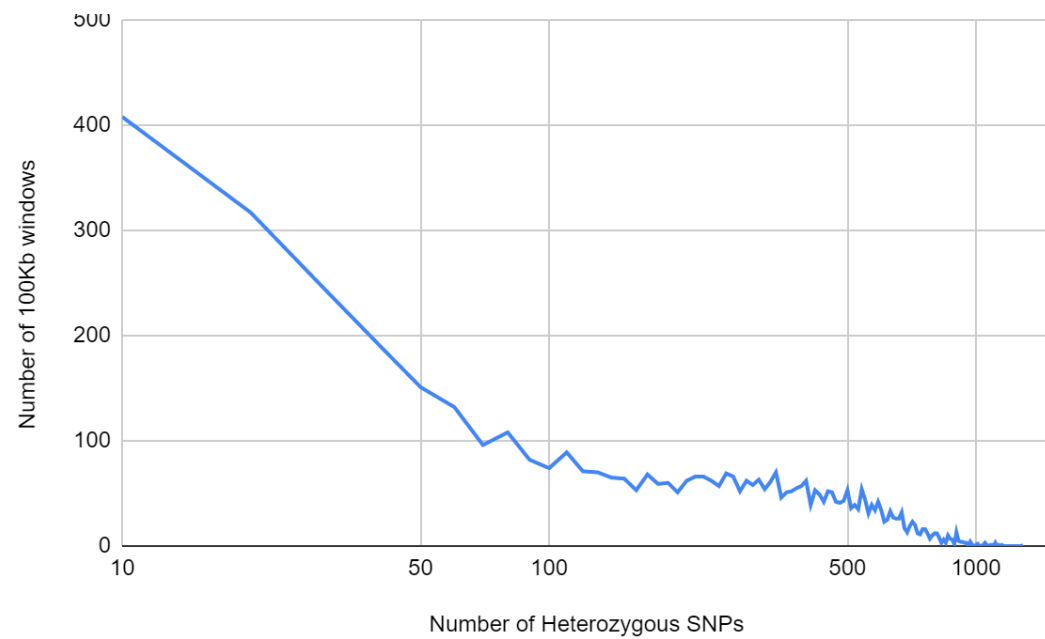

Source: https://www.biorxiv.org/content/biorxiv/early/2021/03/22/2021.03.22.436437.full.pdf
